1  
2  
3  
4  
5  
6  
7  
8  
9  
10  
11  
12  
13  
14  
15  
16  
17  
18  
19  
20  
21  
22  
23  
24  
25  
26  
27  
28  
29

**Research applications of primary biodiversity databases in the digital age**

Joan E. Ball-Damerow<sup>1\*</sup>, Laura Brenskelle<sup>2</sup>, Narayani Barve<sup>2</sup>, Pamela S. Soltis<sup>2</sup>, Petra Sierwald<sup>1</sup>, Rüdiger Bieler<sup>1</sup>, Raphael LaFrance<sup>2</sup>, Arturo H. Ariño<sup>3</sup> & Robert Guralnick<sup>2</sup>

*<sup>1</sup>Field Museum of Natural History, Chicago, IL 60605, U.S.A.*

*<sup>2</sup>Florida Museum of Natural History, University of Florida, Gainesville, FL 32611, U.S.A.*

*<sup>3</sup>Department of Environmental Biology, Universidad de Navarra, Pamplona, Spain*

\*Corresponding author

Email: [joandamerow@gmail.com](mailto:joandamerow@gmail.com)

30 **ABSTRACT**

31           We are in the midst of unprecedented change—climate shifts and sustained, widespread  
32 habitat degradation have led to dramatic declines in biodiversity rivaling historical extinction  
33 events. At the same time, new approaches to publishing and integrating previously disconnected  
34 data resources promise to help provide the evidence needed for more efficient and effective  
35 conservation and management. Stakeholders have invested considerable resources to contribute  
36 to online databases of species occurrences and genetic barcodes. However, estimates suggest that  
37 only 10% of biocollections are available in digital form. The biocollections community must  
38 therefore continue to promote digitization efforts, which in part requires demonstrating  
39 compelling applications of the data. Our overarching goal is therefore to determine trends in use  
40 of mobilized species occurrence data since 2010, as online systems have grown and now provide  
41 over one billion records. To do this, we characterized 501 papers that use openly accessible  
42 biodiversity databases. Our standardized tagging protocol was based on key topics of interest,  
43 including: database(s) used, taxa addressed, general uses of data, other data types linked to  
44 species occurrence data, and data quality issues addressed. We found that the most common uses  
45 of online biodiversity databases have been to estimate species distribution and richness, to  
46 outline data compilation and publication, and to assist in developing species checklists or  
47 describing new species. Only 69% of papers in our dataset addressed one or more aspects of data  
48 quality, which is low considering common errors and biases known to exist in opportunistic  
49 datasets. Globally, we find that biodiversity databases are still in the initial stages of data  
50 compilation. Novel and integrative applications are restricted to certain taxonomic groups and  
51 regions with higher numbers of quality records. Continued data digitization, publication,

52 enhancement, and quality control efforts are necessary to make biodiversity science more  
53 efficient and relevant in our fast-changing world.

54

55 **Keywords:** species occurrence data, open access data, data quality, plants, invertebrates,  
56 vertebrates, natural history collections, citizen science data, linked data

57

58

## 59 I. INTRODUCTION

60 Online databases with detailed information on organism occurrences collectively contain  
61 well over one billion records, and the numbers continue to grow. The digitization of natural  
62 history specimens (1,2) and development of online platforms for citizen science (3) have driven  
63 a steady accumulation of species occurrence records over the past decade. Each data point  
64 provides details on the taxonomic identification, date collected or observed, location, and name  
65 of the collector or observer for an organism. Applications of these primary biodiversity data are  
66 varied—such data have historically helped determine harmful effects of pesticides, document  
67 spread of infectious disease and invasive species, monitor environmental change, and much more  
68 (4–9). The overall goal of this paper is to quantitatively determine how researchers are using  
69 open-access data in published work, focusing on the past decade, when growth of online  
70 biodiversity databases has been most rapid. As one illustration of that growth, the Global  
71 Biodiversity Information Facility (GBIF) has grown from provisioning just over 200 million  
72 records in 2010 to over 1.08 billion records today, a greater than fivefold increase (10).

73 Museums and funding agencies have invested considerable resources to digitize  
74 information from natural history specimens, make their data openly accessible (11,12), and  
75 sustain platforms to provide access to those data. Such efforts unlock previously inaccessible  
76 data and expand their availability to researchers around the world. However, the task of  
77 digitizing highly diverse groups, such as insects, has been particularly difficult. Estimates  
78 suggest that only 10% of biocollections worldwide are available in digital form (13), and it  
79 would take many decades to completely digitize estimated holdings at current rates (14). While  
80 efforts towards workflow optimization will undoubtedly improve efficiency in certain areas  
81 (12,15–18), it is critical that the biocollections community prioritize efforts; we must advocate

82 for continued digitization through production of innovative data products, tools, interdisciplinary  
83 collaborations, and by highlighting research that requires primary biodiversity data (3,19–21).  
84 The greatest returns on digitization investments will result from expanded use of collections data  
85 and by linking a wide array of biotic and abiotic data (1,11). Linked data environments are in  
86 high demand (22,23), are growing rapidly, and provide the greatest potential for data discovery  
87 and use (1).

88 The biggest obstacle for biodiversity data users is obtaining records of sufficient quantity  
89 and quality for the region and taxonomic group of interest (23,24). Many taxa and regions are  
90 still highly under-sampled or completely unrepresented (e.g. rare taxa, regions that are difficult  
91 to access) in online databases (25–27), particularly for less known and highly diverse  
92 invertebrates (28,29). When data are available, they must be checked for common errors and  
93 biases known to occur in opportunistic datasets that are often assembled over long time periods  
94 (e.g. 30)—a task that is labor-intensive (31). Species identity and locality are the most error-  
95 prone aspects of collection information (7). Estimates for rates of collection misidentification  
96 range from 5-60% (11,32,33), but if specimens exist, this information can be verified or  
97 corrected by taxonomic experts. Specimen images, while not always useful for diagnosis, can  
98 often help—particularly when they meet the criteria for taxonomic-grade imaging. Even with  
99 correct identification, names in species occurrence repositories may still be incorrect and need  
100 validation (34). For many broad-scale studies, erroneous records primarily lead to overestimation  
101 of species richness in areas outside centers of diversity (31). Geographic errors may be more  
102 readily corrected and associated with appropriate uncertainty estimates using standardized  
103 methods (35) and online tools (i.e. GEOLocate, [www.geo-locate.org](http://www.geo-locate.org)). Digitization of species  
104 occurrence records makes it easier to identify questionable records by providing quick access to

105 data and identifying outliers. Further, data services are becoming more sophisticated in  
106 automatically addressing some data quality issues (36,37). However, it is possible that many  
107 studies simply use available data and may not appropriately evaluate data quality.

108 Sources of potential biases in opportunistic occurrence data have also been well-  
109 documented in previous work and generally include variation in collection effort and taxonomic,  
110 spatial, and temporal biases (4,38–43). Some examples of variables contributing to bias include  
111 socioeconomic factors (42,43), the exclusion of common species over rare and flashy ones (44–  
112 46), the selection of large and attractive specimens (47), seasonal bias (48), problematic  
113 distinction between living and dead-collected specimens and associated post-mortem  
114 transportation (49,50), and discarding worn specimens, which results in phenological bias or  
115 elimination of specimens with signs of disease (8). Traditional methods for dealing with these  
116 issues may include subsampling, data aggregation, and additional surveys (7). Effects of bias can  
117 be reduced for certain studies with higher numbers of records, by combining information from  
118 different institutions, and including observation records to supplement specimen data (8). Newer  
119 statistical and modeling approaches to deal with biases in biodiversity data have also been  
120 developed (41,46,51,52). However, it is unclear how often studies actually address issues of error  
121 and bias when using opportunistic records.

122 While several previous studies have reviewed uses of natural history collections data  
123 (4,6,8,53), and one study has analyzed field-specific usage for the GBIF index (54), to our  
124 knowledge no other study has quantitatively reviewed trends in how species occurrence  
125 databases are utilized in published research. Our overarching goal in this study is to determine  
126 how such usage has developed since 2010, during a time of unprecedented growth of online data  
127 resources. We also determine uses with the highest number of citations, how online occurrence

128 data are linked to other data types, and if/how data quality is addressed. Specifically, we address  
129 the following questions:

- 130 1.) What primary biodiversity databases have been cited in published research, and which  
131 databases have been cited most often?
- 132 2.) Is the biodiversity research community citing databases appropriately, and are  
133 the cited databases currently accessible online?
- 134 3.) What are the most common uses, general taxa addressed, and data linkages, and how  
135 have they changed over time?
- 136 4.) What uses have the highest impact, as measured through the mean number of citations  
137 per year?
- 138 5.) Are certain uses applied more often for plants/invertebrates/vertebrates?
- 139 6.) Are links to specific data types associated more often with particular uses?
- 140 7.) How often are major data quality issues addressed?
- 141 8.) What data quality issues tend to be addressed for the top uses?

142

## 143 **II. LITERATURE SEARCH AND CHARACTERIZATION**

144

145 We searched for papers that use online and openly accessible primary occurrence records  
146 or add data to an online database. Google Scholar (GS) provides full-text indexing, which was  
147 important for identifying data sources that often appear buried in the methods section of a paper.  
148 Our search was therefore restricted to GS and to the time period of 2010 through the date of the  
149 search (April 2017; note when looking at trends over time we remove 2017, as the year was not  
150 complete in our dataset). All authors discussed and agreed upon representative search terms,  
151 which were relatively broad to capture a variety of databases hosting primary occurrence records.

152 The terms included: “*species occurrence*” database (8,800 results), “*natural history collection*”  
153 *database* (634 results), *herbarium database* (16,500 results), “*biodiversity database*” (3,350  
154 results), “*primary biodiversity data*” database (483 results), “*museum collection*” database  
155 (4,480 results), “*digital accessible information*” database (10 results), and “*digital accessible*  
156 *knowledge*” database (52 results)--note that quotations are used as part of the search terms where  
157 specific phrases are needed in whole. We downloaded the first 500 records (or all if there were  
158 fewer than 500 results), which are presumably the most relevant search returns, for each search  
159 term into a Zotero reference management database (55). We obtained citation numbers for each  
160 paper from the GS search results at the time of downloading records (April 2017; ,56). After  
161 removing duplicates across search terms, the final database included 2,500 papers. We then  
162 randomly sorted papers into four separate sets of 500 to allow subsampling of the dataset.

163 For a study to be relevant in this assessment, there must be an indication that the database  
164 used is publicly accessible online in a searchable database of biodiversity records. The databases  
165 used may include specimen and/or observation-based records from biodiversity data aggregators,  
166 online natural history collection databases, websites devoted to capturing citizen science  
167 observation records, or newly compiled data that are made available in online databases. Studies  
168 were not relevant if they *exclusively* used data that are not available online or from systematic  
169 surveys, government monitoring programs, or field data collected explicitly for the study in  
170 question. However, papers are relevant if they use these other types of occurrence data *in*  
171 *addition to* online databases of primary occurrence records (see section on data linkages, below),  
172 or if they compile these types of occurrence records and deposit them into an existing online  
173 biodiversity data aggregator (e.g. GBIF). Twenty-six percent ( $n = 501$ ; see Supplemental File 1



174 for citation information) of the papers in the final evaluated dataset ( $n = 1,934$ ) were relevant  
175 according to these criteria. The full dataset is published and openly accessible (56).

176 Three of the authors with specialized knowledge of the field (J. Damerow, L. Brenskelle,  
177 and R. Guralnick) characterized relevant papers for the first 1000 papers using a standardized  
178 tagging protocol based on 14 key topics of interest with over 100 total tags. We developed a list  
179 of potential tags and descriptions for each topic; a full list with descriptions of tags is provided in  
180 Supplemental Table 1. J. Damerow subsequently checked each tagged paper from the first 1,000  
181 papers to maintain consistency and became the sole tagger for an additional 934 papers. This  
182 process allowed the development of a more standardized tagging protocol. The database of  
183 tagged papers was then downloaded from Zotero for further data checking and analysis. We used  
184 OpenRefine, an open source tool for data cleaning that aggregates similar records for efficient  
185 clean-up, to standardize tags from the final dataset.

186

### 187 **III. TRENDS IN USES OF PRIMARY BIODIVERSITY DATA**

188

189 We characterize a variety of ways in which researchers are using species occurrence  
190 records by assessing the prevalence of individual tags corresponding to topics of interest. We  
191 identify the most commonly cited databases and most-studied taxa, number of taxa addressed,  
192 most common research uses, the types of data most often linked to species occurrence records,  
193 and aspects of data quality addressed in these papers. In addition, we determine prevalence of  
194 these tags over time to assess positive or negative trends.

195

196 *a. Primary biodiversity databases and accessibility of data*

197

198 We identify 347 primary biodiversity databases used in papers from our dataset  
199 (Supplemental Table 2), the URL for each database, and the scale (institution, regional, global,  
200 taxa) and regional or taxonomic focus (e.g. Australia, fish) of each database. We then evaluate  
201 citation information provided in each paper, and assess whether the data are currently available  
202 online or not by visiting associated URLs. The most cited databases include: the Global  
203 Biodiversity Information Facility ([GBIF](#)), Barcode of Life Data System ([BOLDSystem](#)),  
204 [SpeciesLink](#), Ocean Biogeographic Information System ([OBIS](#)), [Australia's Virtual Herbarium](#),  
205 [Tropicos](#), [FishBase](#), [Fishes of Texas](#), and [CONABIO](#) (Table 1).

**Table 1.** Top ten most used biodiversity databases (see Supplemental Table 2 for a comprehensive list).

| Database Name                                 | Number of Papers Citing |
|-----------------------------------------------|-------------------------|
| <a href="#">GBIF</a>                          | 155                     |
| <a href="#">BOLDSystems</a>                   | 27                      |
| <a href="#">SpeciesLink</a>                   | 21                      |
| <a href="#">OBIS</a>                          | 20                      |
| <a href="#">Australia's Virtual Herbarium</a> | 19                      |
| <a href="#">Tropicos</a>                      | 16                      |
| <a href="#">FishBase</a>                      | 14                      |
| <a href="#">Fishes of Texas</a>               | 13                      |
| <a href="#">CONABIO</a>                       | 11                      |

206  
207 Our dataset includes 165 papers that involve compiling and publishing data online (117  
208 data papers and 60 papers that describe a new database, some of these papers overlap). Previous  
209 work has outlined best practices for publication of biodiversity data (57–62) and scientific data  
210 more generally (e.g. 63). However data are published, primary biodiversity data should also be  
211 integrated into an aggregate system with similar data, such as GBIF, OBIS, VertNet, iDigBio, or  
212 BoldSystems (62).

213 Many researchers do not sufficiently cite databases used (64,65), and links to many  
214 databases become invalid over time (66–68). We found that 34 percent of papers ( $n=170$ ) had  
215 insufficient citation information for one or more databases; this meant that there was either no  
216 URL provided to access the database, or the URL was broken. Twenty-six percent of databases  
217 ( $n=90$ ) cited in one or more papers from our dataset were totally inaccessible at the time of this  
218 assessment. In some cases, researchers appropriately cited a database that is no longer in  
219 operation or has subsequently been integrated into an aggregate system. As a result of  
220 insufficient data citation practices and lack of data preservation, data are either completely lost or  
221 it is impossible to reproduce the dataset used and results. Study reproducibility, strongly linked  
222 to data persistence (66), is a key principle in the scientific process and a growing concern across  
223 scientific disciplines (e.g. 69). Researchers who have compiled data from multiple sources for a  
224 particular analysis can better ensure that their data are accessible and get credit for the work  
225 involved in integrating datasets by formally publishing data with descriptive metadata and obtain  
226 a persistent DOI (63). The prevalence of inaccessible databases and incomplete database  
227 citations indicates that many biodiversity researchers lack the resources to manage and preserve  
228 data for the long term and/or are unaware of best practices.

229 Guidance and infrastructure for citing online data sources have fairly recently emerged  
230 and are still evolving (64,70). One major problem is that many papers using biodiversity data  
231 have obtained data from an aggregator, such as GBIF, which has potentially drawn from  
232 thousands of original data sources. Up to this point, researchers have most often cited GBIF in  
233 this case (usually in-text, not in the reference section) and neglect to credit original data sources  
234 (65). Even for those who attempt to cite sources, many journals do not allow large numbers of  
235 citations in the reference section, and the only solution is to cite sources in a supplement or

236 appendix which does not provide citation credit (65). Data contributors who have submitted data  
237 to aggregators are not getting credit for the significant work spent on data management,  
238 standardization, and quality control. Ideally, data citations should include DOIs for datasets if  
239 they exist and citations of online databases both in text and in the reference section (64,65,71).  
240 We will address data citation practices more thoroughly in a separate paper.

241

242 *b. Research uses*

243

244 A primary topic of interest for this work was to characterize research uses of the study  
245 databases. An initial list of use tags was developed based on usage outlined in (23), which  
246 surveyed needs of primary biodiversity data users. We subsequently split up certain aggregated  
247 topics and revised and added use categories based on important subject areas that arose during  
248 the tagging process. We ended with 31 potential research use tags, as listed and described in  
249 Supplemental Table 1. Most papers had multiple use tags assigned (mean=2.5, max=7). We then  
250 determined the average number of citations for papers involving each data use. Number of  
251 citations was extracted from the original web snapshots of the Google Scholar searches for each  
252 term in April 2017 (56).

253 Expected trends for research uses in published work include the following: *H1*) Data uses  
254 requiring large numbers of dispersed records, such as species distribution models and  
255 biodiversity studies, are the most common uses of online databases and have increased over  
256 time; *H2*) Data papers and papers describing a new database are likely to have increased in  
257 recent years as new venues have grown supporting such publications; and *H3*) Uses involving

258 other online data types (i.e. barcoding, citizen science, species interactions) that can be linked to  
259 species occurrence records are likely to increase.

260 The top research uses for online species occurrence databases—from our dataset of 501  
261 relevant papers—were studies on species distribution ( $n=175$ ), diversity/population studies that  
262 usually assess species richness ( $n=122$ ), dataset description (i.e. data papers,  $n=117$ ), taxonomy  
263 ( $n=95$ ), conservation ( $n=68$ ), data quality ( $n=68$ ), invasive species ( $n=61$ ), and that described a  
264 new database ( $n=60$ , Fig. 1); see Supplemental Table 1 for full descriptions of each category of  
265 research use. The prevalence of most uses did not change from 2010-2016, with the exception of  
266 data papers and taxonomy-related studies, which both increased (Fig. 2); taxonomy studies  
267 usually involved developing regional species checklists. In the aforementioned survey  
268 assessment of user needs for primary biodiversity data (22,23), these same categories of use were  
269 among the top ways in which people listed that they use primary biodiversity data. Some  
270 exceptions were that a relatively large number of survey respondents claimed that they use data  
271 for ecology/evolution studies, natural resources management, life history/phenology studies, and  
272 education/outreach, but relatively few published studies used occurrence data for these purposes  
273 in our dataset. It is possible that people use data for these purposes, but do not necessarily  
274 publish papers on the topic or may not cite databases for this work (72).

275

276 **Figure 1.** Frequency of major research uses in published papers ( $n = 501$ ) that obtain data from  
277 species occurrence records available in online databases. See Supplemental Table 1 for detailed  
278 descriptions of each research type.

279

280 **Figure 2.** Change in the number of papers from 2010-2016 involving the top six research  
281 applications for online species occurrence databases.

282

283

284 Some of the top research uses involved compiling and processing data, as reflected in the  
285 high numbers of data papers, papers describing new databases, and papers addressing data  
286 quality and data gaps (all of which were among the top ten uses, Fig. 1). The biodiversity  
287 community is still in an active stage of compiling existing biodiversity data and dealing with  
288 issues of data quality. Data papers and papers describing a new database have increased over  
289 time (Fig. 2), which is likely to be the result of the introduction and expansion of many data  
290 journals (57,73), online platforms for reporting species occurrence observations such as  
291 iNaturalist (74) and eBird (3,75), and efforts over the past decade to digitize specimen records  
292 (1,13). More journals accept papers or even focus on publishing high-quality data and recognize  
293 this as an important part of the scientific process (62,72,76,77).

294 Papers with the highest mean number of citations per year involved more applied studies  
295 in disease ecology (mean = 18, SD = 33), public health (mean = 8, SD = 7), documenting  
296 extinctions (mean = 7, SD = 7), developing a new analytical method to deal with species  
297 occurrence data (mean = 7, SD = 8), and citizen science (mean = 7, SD = 6; Table 2). Papers  
298 with the highest maximum number of citations per year focused on disease ecology, species  
299 diversity, and publishing data (each with a maximum of 97 citations/year; Table 2); we did not  
300 account for self-citation here.

301

**Table 2.** Summary statistics for the number of citations per year for each use of primary biodiversity data. Note that not all papers had citation data available.

| <b>Data Use</b>        | <b>n</b> | <b>mean</b> | <b>sd</b> | <b>min</b> | <b>max</b> |
|------------------------|----------|-------------|-----------|------------|------------|
| Disease Ecology        | 8        | 18          | 33        | 2          | 97         |
| Public Health          | 9        | 8           | 7         | 0          | 22         |
| Extinction             | 6        | 8           | 7         | 1          | 17         |
| Analytical Method      | 26       | 7           | 8         | 1          | 34         |
| Citizen Science        | 7        | 7           | 6         | 1          | 17         |
| Species Distribution   | 152      | 6           | 10        | 0          | 97         |
| Climate                | 46       | 6           | 6         | 0          | 32         |
| Niche                  | 24       | 6           | 5         | 0          | 20         |
| Data Quality           | 59       | 6           | 8         | 0          | 37         |
| Diversity/Population   | 108      | 5           | 10        | 0          | 97         |
| Data Paper             | 94       | 5           | 11        | 0          | 97         |
| Other(Paleontological) | 3        | 5           | 5         | 0          | 10         |
| Other(Behavior)        | 1        | 5           | NA        | 5          | 5          |
| Data Gap               | 56       | 5           | 6         | 0          | 28         |
| Agriculture            | 10       | 5           | 4         | 1          | 13         |
| Invasive Species       | 55       | 5           | 5         | 0          | 32         |
| Conservation           | 61       | 5           | 6         | 0          | 22         |
| Endemism               | 23       | 5           | 5         | 0          | 20         |
| Evolution              | 17       | 5           | 3         | 0          | 12         |
| Barcoding              | 22       | 5           | 4         | 0          | 16         |
| Biogeography           | 41       | 5           | 4         | 0          | 16         |
| New Database           | 50       | 4           | 6         | 0          | 29         |
| Species Occurrence     | 26       | 4           | 4         | 0          | 22         |
| Interactions           | 7        | 3           | 3         | 1          | 9          |
| Natural Resources      | 24       | 3           | 3         | 0          | 12         |
| Environmental Impact   | 18       | 3           | 2         | 0          | 7          |
| Other(Movement)        | 3        | 3           | 2         | 2          | 5          |
| Life History           | 10       | 3           | 2         | 1          | 8          |
| Taxonomy               | 72       | 2           | 3         | 0          | 16         |
| Other(Ethnobotany)     | 1        | 2           | NA        | 2          | 2          |
| Education              | 5        | 2           | 2         | 0          | 5          |
| Social                 | 14       | 2           | 1         | 0          | 5          |
| Other(Reference)       | 1        | 1           | NA        | 1          | 1          |

302

303

304        *c. Taxa addressed*

305

306            The third major topic for this work was to determine how often different taxonomic  
307 groups are represented in papers utilizing biodiversity databases. Taxa in relevant papers were  
308 coarsely characterized as plants, vertebrates, invertebrates, fungi, paleo, and/or all taxa; note that  
309 we addressed only macro-organisms because they are the focus of non-sequence-based species  
310 occurrence databases. These general taxonomic categories also correspond to common divisions  
311 for the organization of natural history collections and associated databases. Many papers include  
312 more than one taxon, and we use an “all taxa” categorization for studies that use all available  
313 data within the species occurrence database(s), such as GBIF. We further categorized taxa  
314 addressed in each paper by adding one or more tag(s) for more specific taxonomic classifications  
315 (e.g. butterflies, *Danaus plexippus*). While an in-depth assessment of specific taxa is beyond the  
316 scope of the current paper, we did tag the number of taxa addressed in each paper, if that number  
317 was apparent. Our goals here were to characterize the most commonly studied taxonomic groups,  
318 the number of taxa addressed, and to determine uses associated with the three most common  
319 organismal groupings (plants, vertebrates, and invertebrates).

320            Expected trends for taxonomic groups addressed in published work include the  
321 following: *H1*) Papers involving plants will be the most common, given work by Tydecks *et al.*  
322 (2018); *H2*) Vertebrate data are generally more often applied towards species distribution and  
323 conservation studies; *H3*) Invertebrate studies are the least common of the three major groups  
324 and are more likely to be the subject of taxonomy, species richness, and barcoding studies; and  
325 *H4*) The number of species addressed is likely to increase over time as data for more species  
326 become available online and more ambitious projects are undertaken leveraging broad-scale data.



327           The most commonly studied taxa were plants ( $n=232$  papers, 46%), followed by  
328 invertebrates ( $n=125$ , 25%), vertebrates ( $n=124$ , 25%), “all taxa” ( $n=40$ , 8%), fungi ( $n=16$ , 3%),  
329 and paleontological specimens ( $n=14$ , 3%; Table 3). However, the gap between number of  
330 papers addressing plants, vertebrates, and invertebrates closed in recent years (2014–2016, Fig.  
331 3). The overall prevalence of plants in this work corroborated a recent bibliometric study, which  
332 found that 56% of biodiversity-related papers addressed plants, compared to 29% for vertebrates  
333 and 23% for invertebrates (78). The prevalence of plants in the field of biodiversity research may  
334 be the result of several factors. Plants are far more diverse than vertebrates (known to be  
335 relatively well-studied) and therefore generally require more taxonomic work. Herbarium sheets  
336 have also been the easiest historically to digitize, as sheets can be scanned and imaged using  
337 more automated processes (11,15). The current prevalence of plants may also partially be the  
338 result of a strong history of plant research in Europe; this tendency is known as the “Matthew  
339 principle” whereby research concentrates on already well-studied subjects (78). The total number  
340 of invertebrate studies was equivalent to the total number of vertebrate studies (Fig. 3). However,  
341 invertebrates are much more diverse in terms of species (estimated at 6,755,830 species, see 79),  
342 and vertebrates are unquestionably more studied on a per-species basis. The numbers of papers  
343 addressing vertebrates and invertebrates has increased slightly and were roughly equivalent over  
344 time (Fig. 3). The frequency of papers addressing “all taxa” from online databases has not  
345 changed significantly over time (Fig. 3).

346

347 **Figure 3.** Number of papers addressing the major taxonomic groups and paleontological records.

348

349

**Table 3.** Total number of papers from dataset (501) addressing the major taxonomic groups and paleontological specimens.

| <b>Taxa</b>   | <b>Number of papers</b> |
|---------------|-------------------------|
| Plants        | 232                     |
| Invertebrates | 125                     |
| Vertebrates   | 124                     |
| All           | 40                      |
| Fungi         | 16                      |
| Paleo         | 14                      |

350

351           The most common data uses associated with the major taxonomic groups reflect the  
352 general maturity of data products associated with the respective group. Over 50% of vertebrate  
353 studies involved investigating species distribution (Fig. 5); vertebrate data are generally more  
354 suitable for distribution studies because vertebrates are less diverse, many collections are  
355 completely digitized, and data for individual species are likely to contain sufficient numbers of  
356 records. Birds in particular have relatively good data available, in part because of online citizen  
357 science efforts and associated open data platforms such as eBird (3). While distribution studies  
358 were still the most common application for plants and invertebrates, only 33% and 41%,  
359 respectively, of plant and invertebrate studies dealt with species distribution. Plants and  
360 especially invertebrates are much more diverse, and the average species in these groups are less  
361 likely to have data of sufficient quantity and quality to estimate species distribution, although  
362 growth in resources especially for plants is closing the gap. Data on insect distributions, in  
363 particular, are less complete (or non-existent) for most species and hence may not be suitable for  
364 distribution and conservation studies (80,81).

365

366

367 **Figure 5.** Percentage of papers involving each of the major taxonomic groups  
368 (invertebrates, plants, and vertebrates) that use species occurrence databases  
369 for certain research applications: species distribution, diversity/population,  
370 data paper, taxonomy, invasive species, biogeography, climate change, and  
371 barcoding.

372

373 A higher percentage of data papers, taxonomy, and barcoding papers involved  
374 invertebrates (Fig. 5), reflecting in part the high taxonomic diversity for this group and need for  
375 more data. There are around 60,000 species of vertebrates, an estimated 400,000 plants, and an  
376 estimated 5–6 million species of insects—about one million insect species are currently  
377 described, which highlights the need for more taxonomic work in this group (19,82). Other  
378 invertebrate phyla, such as Mollusca, are highly diverse as well (estimated 70,000–76,000 living  
379 species; ,83). Digitizing efforts for invertebrates have been particularly challenging, because  
380 many clades are so diverse, collections have much larger numbers of specimens, and the  
381 typically small specimens are difficult to digitize (84). Automating digitization of such  
382 specimens, especially pinned insects and fluid-preserved invertebrates, faces significant  
383 obstacles (12,17,85–88).

384 The use of species occurrence data for conservation followed predicted trends. Vertebrate  
385 studies were more likely to address conservation; 23% of papers using vertebrate biodiversity  
386 records involved conservation, as compared to 14% of papers using plant records and 12% of  
387 papers using invertebrate records (Fig. 5). Twenty percent of vertebrate species are currently  
388 classified as threatened, and that number is increasing (89). While vertebrates have more data,  
389 they are by no means complete (90); less-studied vertebrates (i.e. fish) are also the least digitized,

390 as compared to birds (91). Large species tend to receive more research focus and conservation  
391 funding, and very few conservation assessments exist for invertebrate taxa; most insect species  
392 are classified as “data deficient” (e.g. 92). There is much need and potential for using primary  
393 biodiversity data to help determine conservation status of insects—perhaps starting with taxa  
394 known to be biological indicators of ecosystem health (e.g. 93,94) and insects that provide  
395 important ecosystem services (e.g. 95). However, identifying decline requires large numbers of  
396 records along with systematically collected surveys over time, which often do not exist for rare  
397 and potentially threatened species (96). Opportunistic species occurrence records may therefore  
398 be best used to identify data gaps and promising areas for resurveys or standardized long-term  
399 monitoring studies when dealing with species decline (46).

400         Contrary to expectations, we found that studies addressing “all taxa” remained fairly  
401 consistent over time (Fig. 3), and the maximum number of taxa addressed did not increase (Fig.  
402 4). However, this may simply be an effect of small sample sizes. Only four papers involved  
403 numbers of species in the hundreds of thousands over the period of 2010-2017 (Table 4). Most  
404 papers focused on numbers of species in the single or double digits (Table 4). We found that the  
405 top data uses for papers that addressed “all taxa” involved data compilation and data quality  
406 (data quality assessments, data gap studies, data papers, and reporting on new databases,  
407 respectively). We argue that the scale of data that needs processing, along with issues of often  
408 sparse data, data obsolescence (97), and data of uncertain quality, make large-scale analyses  
409 challenging for anyone but a small group of data sciences-savvy end users. Additionally,  
410 effective large-scale assessments are often impossible without significant investments and active  
411 collaboration across study domains (e.g. taxonomy, ecology, biodiversity informatics) and  
412 geographical regions (98).

413

414 **Figure 4.** Maximum number of taxa addressed in papers ( $n=501$ ) from 2010-2016.

**Table 4.** Number of taxa addressed by papers using online species occurrence records.

| Number of taxa addressed | Number of papers |
|--------------------------|------------------|
| 1-9                      | 113              |
| 10-99                    | 106              |
| 100-999                  | 82               |
| 1,000-9,999              | 68               |
| 10,000-99,999            | 22               |
| 100,000-999,999          | 4                |

415

416

417 *d. Links to other data types*

418

419 We determine how studies link primary biodiversity data to other data types by  
420 characterizing the variety of data compiled and used in each study (see Supplemental Table 1 for  
421 full descriptions of 28 data linkage tags). We searched for information regarding other data types  
422 used within the methods section of each paper. Data link tags fall under four general categories  
423 of data types, including 1.) other types of occurrence data (i.e. data from literature, field surveys,  
424 species catalogues, private data); 2.) attributes of species occurrence data (e.g. information about  
425 the holding collections of specimens, species traits, conservation status, genetic data, associated  
426 image(s), species interactions, population data); 3.) environmental data (e.g. climate, geographic  
427 information, habitat, ecoregion, etc.); and 4.) data that can be used to determine biases or gaps  
428 (socioeconomic data, expert knowledge, and accessibility of sites—with the last usually  
429 evaluated through proximity to roads or research institutions). We then determine the average

430 number of data link tags associated with the six top uses, and the most common data type  
431 associated with each of these top uses.

432 Expected trends for studies using other data types linked to species occurrence records:

433 *H1*) Climate data are likely to be the most common environmental variable linked to species  
434 occurrence records; and *H2*) Other types of occurrence data are also commonly used, as studies  
435 often need more data records than are currently available.

436 Data types that were most often used in association with online species occurrence  
437 databases (out of 501 relevant papers) included occurrence records from previously published  
438 literature ( $n=189$ ), climate ( $n=149$ ), occurrence records from surveys ( $n=143$ ), collection  
439 information ( $n=135$ ), habitat ( $n=118$ ), traits ( $n=111$ ), and geographic data ( $n=106$ , Fig. 6).  
440 Three data types increased from 2010–2016, including collection, genetic, and phylogenetic data  
441 (Fig. 6). The average number of data linkages per paper was four (ranging from one to 11).

442

443 **Figure 6.** Number of papers that incorporate other data types to supplement or associate with  
444 online species occurrence records. Data types fall within one of four categories, including 1.)  
445 attributes of occurrence information, 2.) data types that may help address bias in the data, 3.)  
446 environmental variables, and 4.) other kinds of occurrence data.

447

448 Table 5 summarizes top data linkages for different key uses. As predicted, climate is  
449 often a critical data linkage, especially for species distribution where it is the most common  
450 linkage, and for diversity/population studies where it is a close second. For data papers and  
451 taxonomy studies, both collection data and literature data were often the most common data  
452 linkages. Conservation-focused studies that included species occurrences from databases also

453 linked conservation status, habitat, literature, and climatic data. Data quality studies often  
 454 included a variety of data linkages, with little sorting of top linkages likely representing the high  
 455 dimensionality of data quality issues.

**Table 5.** Percentage of papers that associate online occurrence data with other data types—separated by the six top uses of these databases. Nine data types with the lowest percentages were removed from table. The top data type for each research use is bolded, and percentage values above 10% are highlighted yellow, orange, and red\*.

| Data Type     | Species Distribution | Diversity/Population | Data Paper | Taxonomy  | Conservation | Data Quality |
|---------------|----------------------|----------------------|------------|-----------|--------------|--------------|
| Climate       | <b>58</b>            | 37                   | 7          | 2         | 32           | <b>26</b>    |
| Literature    | 41                   | <b>40</b>            | 29         | <b>52</b> | 40           | <b>26</b>    |
| Geographic    | 37                   | 31                   | 11         | 2         | 34           | 21           |
| Surveys       | 36                   | 36                   | 29         | 32        | 32           | 13           |
| Habitat       | 30                   | 34                   | 18         | 11        | 43           | 21           |
| Collection    | 28                   | 23                   | <b>44</b>  | <b>53</b> | 18           | 22           |
| Traits        | 25                   | 25                   | 15         | 26        | 25           | 13           |
| Conservation  | 20                   | 29                   | 9          | 15        | <b>75</b>    | 15           |
| Expert        | 15                   | 7                    | 9          | 3         | 22           | 7            |
| Private       | 15                   | 13                   | 8          | 5         | 10           | 7            |
| Range         | 14                   | 12                   | 6          | 5         | 22           | 13           |
| Catalogues    | 11                   | 18                   | 20         | 25        | 19           | 22           |
| Hydrography   | 11                   | 12                   | 3          | 2         | 16           | 1            |
| Soil          | 11                   | 11                   | 2          | 0         | 10           | 3            |
| Ecoregion     | 10                   | 24                   | 8          | 6         | 19           | 7            |
| Genetic       | 10                   | 13                   | 24         | 26        | 6            | 6            |
| Social        | 10                   | 7                    | 4          | 1         | 13           | 7            |
| Interaction   | 9                    | 5                    | 4          | 8         | 6            | 0            |
| Paleo Climate | 7                    | 5                    | 1          | 0         | 1            | 0            |
| Image         | 5                    | 4                    | 21         | 23        | 1            | 7            |
| Phylogenetic  | 5                    | 11                   | 12         | 16        | 1            | 4            |

\*% of Papers: **> 50** 30-49 10-29

456  
 457 The high prevalence of studies compiling occurrence records from other sources indicates  
 458 a continued demand for more and continued specimen sampling and the need for more progress  
 459 in getting these data digitally captured and into online databases (i.e. data papers and new  
 460 database development). Three of the top five data types linked to online occurrence records were

461 other types of occurrence data, including literature-based occurrence data, surveys, and specimen  
462 data from natural history collections ( $n=189$ ,  $n=145$ , and  $n=135$  papers used these data types,  
463 respectively). Sometimes the compiled data eventually make it into online data aggregators, such  
464 as GBIF, and sometimes they do not. Continued advocacy for data publication will be important  
465 to maximize the potential use of all biodiversity data.

466 Environmental data used in conjunction with online biodiversity records are usually  
467 applied in studies of species distribution. Specific environmental parameters used to predict  
468 distribution should be informed by expert knowledge of the requirements of a given species.  
469 Among environmental variables, climate data are perhaps the most readily available, relevant for  
470 the distribution of organisms on a global scale, and provide essential information for determining  
471 impacts of climate change on distribution (99,100). Our data show that climate is indeed the  
472 most common environmental variable used in association with occurrence records (Fig. 6; also  
473 documented in 54). The second and third most common environmental data types used were  
474 geographic and habitat, which usually included GIS layers for elevation and land use and/or  
475 vegetation (see Supplemental Table 1). Elevation, land use, and vegetation data are also among  
476 the most readily available environmental data types, and are often relevant for evaluating species  
477 distribution at smaller spatial scales (101). Despite increasing calls for incorporating relevant  
478 biotic interactions into models, only nine distribution studies incorporated data on interactions  
479 (i.e. competitive, consumptive, symbiotic, or pathogenic relationships), and 30 studies overall  
480 involved species interactions. The relatively low prevalence of species interaction information in  
481 these studies is thought to be primarily due to the large spatial scales usually considered in  
482 distribution models. Biotic interactions are often studied on a smaller scale by community  
483 ecologists, while distribution modeling is often done by macroecologists (102). Primary species



484 occurrences may provide needed data for studying biotic interactions on a larger scale, but these  
485 data are often not digitized, even if they exist in collections, and compiling data of sufficient  
486 quantity and quality for a given taxon remains an obstacle due to lack of automated data capture  
487 options for invertebrate collections.

488         The only data types that have increased over time were specimen collection, genetic, and  
489 phylogenetic data (Fig. 7). We expected to see an increase in use of genetic data in particular, as  
490 these data are known to have expanded with the growth of databases such as the Barcode of Life  
491 Data System (BOLDSystems), linking molecular, morphological, and distribution data (103); the  
492 number of records in BOLDSystems increased from about 0.5 million in 2007 to 1.5 million  
493 today (104). Further, large-scale phylogenetic resources such as Open Tree of Life (105),  
494 launched in 2015, have made it easier than ever before to assemble those resources with other  
495 species data. The increasingly available collections, genetic, and phylogenetic data are highly  
496 relevant in taxonomy-related studies and data papers, which increased over time (Fig. 2).

497  
498 **Figure 7.** Data types that increased over the period from 2010 through 2016. These include data  
499 needed for taxonomic/phylogenetic studies, namely those from natural history specimens,  
500 genetic data, and phylogenetic data.

501  
502         Both taxonomy and data papers used collection data most frequently in addition to data  
503 already available in online databases. Taxonomy uses of online species occurrence databases  
504 sometimes involve describing new species, but more commonly involve compilation of regional  
505 species checklists. The most traditional use of collections data is for taxonomy, so it is not  
506 surprising that over 50% of taxonomy papers also involve collections and literature data. The

507 relatively high percentage of data papers that involve collections data (44%) reflects recent  
508 digitization efforts for natural history collections (1,9,13,106).

509

510 *e. Data quality*

511

512 We characterize papers that address major data quality issues known to be associated  
513 with species occurrence data, including both common errors and biases. Data quality tags  
514 involve improving data quality for a particular purpose addressed in the paper. Taxonomic  
515 nomenclature, species identification, spatial, and temporal data quality tags represent  
516 adjustments to the dataset used in a study that at least partially corrects the associated errors (see  
517 Supplemental Table 1). We also characterize studies that exclude certain inappropriate records,  
518 remove records with high georeferencing uncertainty, remove outliers, and those that address  
519 collection effort—see Supplemental Table 1). In addition to errors, some studies address specific  
520 biases known to be a problem in opportunistic datasets, including taxonomic, spatial, temporal,  
521 and environmental biases. Finally, we have a “detection” tag to represent use of statistical  
522 methods to estimate detection probability (51). We assess the average number of quality tags  
523 associated with papers overall, and the most common data quality issues addressed within each  
524 of the top uses. We hypothesize that the most common data quality issues addressed are likely to  
525 be checks for correct taxonomic nomenclature and correct georeferences.

526 Overall, 69% of studies from our dataset that used online species occurrence records  
527 addressed one or more aspects of data quality. The biggest data quality concerns cited by users of  
528 primary biodiversity data in a recent survey (23) were georeference quality and taxonomic  
529 quality—we found that studies addressed these issues in 24% (spatial error in georeferences),

530 39% (taxonomic nomenclature), and 19% (species identifications) of published papers from our  
531 dataset (Table 6). Two data quality checks increased from 2010 to 2016: correcting taxonomic  
532 nomenclature and specimen identification (Fig. 8), reflecting also the increase in taxonomy-  
533 related and data papers.

534

535 **Figure 8.** Number of papers that address identification errors and/or update taxonomic  
536 nomenclature over the period of 2010-2016.

**Table 6.** Papers from dataset ( $n = 501$ ) that addressed data quality issues associated with species occurrence records.

| Quality Tag        | Number of Papers | Percentage |
|--------------------|------------------|------------|
| Taxonomic          | 193              | 39%        |
| Spatial            | 121              | 24%        |
| Identification     | 94               | 19%        |
| Spatial Bias       | 59               | 12%        |
| Exclusion          | 57               | 11%        |
| Effort             | 50               | 10%        |
| Precision          | 30               | 6%         |
| Temporal           | 18               | 4%         |
| Outliers           | 17               | 3%         |
| Temporal Bias      | 11               | 2%         |
| Taxonomic Bias     | 9                | 2%         |
| Environmental Bias | 6                | 1%         |
| Detection          | 4                | 1%         |

537

538

539 Spatial errors and taxonomic nomenclature are generally the easiest data quality errors to  
540 correct. Non-experts can check for spatial outliers or incorrect georeferences using standardized  
541 methods and online georeferencing tools (35,107). Depending on data needs, one may also use  
542 existing error radii associated with georeferenced coordinates to select appropriate records for a

543 study. However, most records in GBIF, for example, still do not have error radii; in a recent  
544 assessment of GBIF records for Odonata, Ephemeroptera, Plecoptera, and Trichoptera from the  
545 U.S.A., we found that the percentage of records with error radii associated with them was only 7-  
546 36% for these aquatic insect groups (as of April 2017). Of the 6.2 million catalogued molluscan  
547 lots in U.S. and Canadian collections, 4.5 million have undergone some form of data digitization.  
548 Of these, about 1.1 million (24%) of digitized records have been georeferenced, which represents  
549 18% of all catalogued lots (47). However, only a subset of these have error radii associated.  
550 Many digitization efforts for insects in particular have prioritized transcribing and publishing  
551 specimen label information and have not yet begun or completed georeferencing.

552 Online taxonomic catalogues and tools to check records against updated catalogues are  
553 available for correcting taxonomic nomenclature (108,109). However, we still have not reached  
554 the major goal of having online taxonomic data sources that are consistently updated by  
555 taxonomic experts for all species, although community-supported resources such as FishBase  
556 (110), WoRMS (111), and the latter's affiliated databases such as MilliBase (112), and  
557 MolluscaBase (113) are approaching that goal for many taxonomic groups. Other groups may  
558 lack online sources or have sources that are significantly out of date (114). Unfortunately, the  
559 decline in resources devoted to the field of taxonomy does not bode well for achieving a unified  
560 taxonomic backbone usable for resolving all taxonomic issues (115,116). Given the speed of  
561 taxonomic concept changes (117), lack of updated resources is a significant impediment to  
562 proper data integration. The best way for taxonomic experts to help ensure that nomenclature for  
563 their group is current is to engage with the community-supported and specialist-edited taxonomic  
564 database projects in their respective fields. The combined data of massive authority file efforts

565 spanning multiple taxon groups, such as those covered by WoRMS, allow for novel approaches  
566 to data analysis (118).

567         Correcting species identifications requires taxonomic expertise for many organisms,  
568 particularly high-diversity groups such as insects. Many users outside of the community of  
569 trained collection scientists may not understand or be interested in taxonomic concepts (1).  
570 Therefore, despite misidentification being a well-known problem, this issue is less often directly  
571 addressed in papers. For those who are not taxonomic experts, some possible approaches to  
572 address misidentifications include: choosing taxonomic groups that are relatively easy to identify  
573 and less likely to have identification error, or including only records identified by reliable  
574 experts. For broad-scale biodiversity studies it may be appropriate to check occurrence locations  
575 against known ranges (where those exist); one may then identify outliers in the data where  
576 species are found in regions where they are not known to occur. Such efforts require both  
577 taxonomic and geospatial skills, although some automation may be possible (119).

578         Biases that result from variation in collection effort across space, time, taxonomic groups,  
579 and environments are also well-known problems in opportunistic biodiversity records  
580 (30,39,40,80). The most commonly addressed bias in our dataset was spatial (addressed in 12%  
581 of papers, Table 7), as it is important for accurate species distribution modeling, and some  
582 methods to deal with spatial bias have been developed (39). Other forms of bias were rarely  
583 addressed in only 1–2% of papers and include temporal bias (usually seasonal bias for certain  
584 times of year, or bias for certain years where specialists are active), taxonomic bias (e.g.  
585 preference for endangered species, charismatic taxa, avoiding common species or  
586 pests)(45), and environmental bias (e.g. preference for collecting in certain habitats or climates)  
587 (39).

**Table 7.** Percentage of papers that check aspects of data quality for online occurrence data—separated by the six top uses of these databases. Nine data types with the lowest percentages were removed from table. The top data type for each research use is bolded, and percentage values above 10% are highlighted yellow, orange, and red\*.

| Data Quality Check          | Species Distribution | Diversity/Population | Data Paper | Taxonomy  | Conservation | Data Quality |
|-----------------------------|----------------------|----------------------|------------|-----------|--------------|--------------|
| Spatial                     | <b>28</b>            | 27                   | 26         | 9         | 29           | <b>40</b>    |
| Taxonomic                   | 27                   | <b>48</b>            | <b>48</b>  | <b>56</b> | <b>40</b>    | <b>40</b>    |
| Spatial Bias                | 24                   | 15                   | 4          | 2         | 16           | 29           |
| Identification              | 21                   | 14                   | <b>38</b>  | <b>40</b> | 9            | 18           |
| Exclusion                   | 19                   | 20                   | 5          | 1         | 15           | 9            |
| Effort                      | 14                   | 19                   | 9          | 2         | 12           | 25           |
| Precision                   | 9                    | 7                    | 3          | 0         | 12           | 15           |
| Outliers                    | 5                    | 1                    | 1          | 1         | 3            | 10           |
| Temporal Bias               | 4                    | 3                    | 2          | 1         | 1            | 4            |
| Temporal Environmental Bias | 3                    | 2                    | 5          | 1         | 1            | 13           |
| Taxonomic Bias              | 2                    | 1                    | 1          | 1         | 0            | 6            |
| Taxonomic Bias Detection    | 2                    | 4                    | 2          | 0         | 1            | 4            |
| Detection                   | 1                    | 0                    | 0          | 0         | 1            | 1            |

\*% of Papers: > 50 30-49 10-29

588

589 Data quality issues addressed are often dictated by the specific use. The most commonly  
 590 checked data quality issues for papers involving species distribution were spatial errors (28% of  
 591 distribution studies), taxonomic nomenclature (27%), spatial bias (24%), specimen identification  
 592 (21%), and excluding inappropriate records (19%; Table 6). Taxonomic nomenclature was the  
 593 most commonly checked data quality issue for all other top uses, ranging from 40% of papers  
 594 (conservation and data quality uses) to 56% (taxonomy). In general, taxonomy papers only check  
 595 issues related to nomenclature and identification. Data quality papers tend to focus evenly on the  
 596 two most easily corrected issues (spatial and taxonomic, each 40% of data quality papers),  
 597 followed by accounting for spatial bias (29% of data quality papers), effort (25%), and correcting  
 598 specimen identification (18%). Diversity/population and conservation papers both also address  
 599 taxonomic nomenclature and spatial errors most frequently (Table 7).

600 Automated data quality annotations are growing within the major online data aggregators  
601 (e.g. GBIF, iDigBio), but there is still much room to improve upon methods to easily tag data  
602 and highlight errors, biases, and uncertainty levels in the data. We need better methods to  
603 document confidence in data at a record and dataset level (22). When data quality is addressed, it  
604 is usually done manually, and workflows are difficult to document, extend, and share. More  
605 recently, programs to automate and document data cleaning workflows have been developed,  
606 such as Kurator, a Kepler data curation package (36), but are not yet widely used due to the  
607 highly technical user interface, and have uncertain future support. Biodiversity databases allow  
608 efficient access to data that can expedite work, but care is still needed when using these  
609 resources. Data quality improvements on a large scale will require additional investment in data  
610 enhancements (e.g. collaborative georeferencing using standardized point-radius method) and  
611 quality control (e.g. efficiently identifying records that may need correction or attention from  
612 taxonomic experts).

613

#### 614 **IV. CONCLUSIONS AND NEXT STEPS**

615 (1) A high proportion of studies did not sufficiently cite databases, and many databases were  
616 no longer accessible at the time of this study; in most cases it was unclear whether the  
617 data were lost or moved to an aggregator. Continued efforts in data preservation and  
618 promoting best practices in data citation are essential for advancing scientific  
619 reproducibility, sustaining data resources, and encouraging publication of high-quality  
620 biodiversity data.

621 (2) The increasing number of data papers over time reflects progress in digitization and  
622 online platforms for reporting observations through citizen science, as well as increases

623 in journals that support data publication. Continued growth of data publications will  
624 enhance the efficiency and relevance of the field in addressing biodiversity conservation  
625 and environmental management.

626 (3) Our study corroborated a recent bibliometric analysis of the larger field of biodiversity  
627 research, finding that more studies address plants (46% of studies using biodiversity  
628 databases) than vertebrates (25%) and invertebrates (25%). The prevalence of plants in  
629 studies that use online biodiversity databases may be due to a strong history of plant  
630 diversity work in Europe in particular, and the relative ease with which herbarium records  
631 can be digitized by scanning herbarium sheets.

632 (4) While studies overall were less common for vertebrates than for plants, vertebrates may  
633 generally be more suitable for distribution studies because the group is less diverse, many  
634 collections are completely digitized, there are prolific citizen science communities  
635 reporting bird observations in particular, and data for individual species are more likely to  
636 contain sufficient numbers of records. Conservation studies are also more common for  
637 vertebrates, likely because they are disproportionately represented in threat assessments.  
638 In contrast, highly diverse invertebrates are more likely to be the subject of foundational  
639 biodiversity studies, such as taxonomy, barcoding, and data papers.

640 (5) It is concerning that a relatively large proportion of studies does not explicitly address  
641 data quality—only 69% of studies in our dataset reported addressing one or more aspects  
642 of data quality. Authors who do address data quality are most likely to standardize  
643 nomenclature using online resources or to correct spatial errors. For nearly all uses of  
644 these data, there are errors and biases that can compromise results when using  
645 opportunistic records. Improving upon automated solutions to flag errors, and efficient



646 mechanisms to report and correct data quality issues is critical in advancing the relevance  
647 and broadest use of this type of biodiversity data (120).

648 (6) Significant investments in data enhancement and quality control are needed. This may be  
649 one limiting factor holding back studies that utilize all data currently held within  
650 biodiversity databases and studies that address very large numbers of taxa within clades.  
651 We found only four studies since 2010 that address hundreds of thousands of taxa, and  
652 most papers address numbers of taxa in the single or double digits. Large-scale  
653 improvements in data availability and fitness will require interdisciplinary effort and  
654 collaboration.

655 (7) To limit the scope of the present paper, we focused efforts here on data citation, research  
656 uses, general taxa addressed, data linkages, and data quality issues addressed. However,  
657 we are also utilizing the dataset of tagged papers to address additional questions  
658 regarding author connectedness and collaboration across institutions, countries, and  
659 disciplines. Such next-step efforts will provide additional context about the nature and  
660 scope of collaborations and resources that coalesce around digitally accessible primary  
661 biodiversity data.

662

## 663 **V. ACKNOWLEDGEMENTS**

664 This research was supported in part through a Bass Postdoctoral fellowship to J. Ball-Damerow  
665 at the Field Museum of Natural History (Chicago, USA), under the mentorship of P. Sierwald  
666 and R. Bieler, and by the Negaunee Foundation. We also thank Paula Zermoglio, and John  
667 Wieczorek for their advice and assistance in developing methodology during the initial stage of  
668 this work.  
669

670 VI. REFERENCES  
671

1. Beaman R, Cellinese N. Mass digitization of scientific collections: New opportunities to transform the use of biological specimens and underwrite biodiversity science. *ZooKeys*. 2012 Jul 20;209:7–17.
2. Matsunaga A, Thompson A, Figueiredo RJ, Germain-Aubrey CC, Collins M, Beaman RS, et al. A Computational- and Storage-Cloud for Integration of Biodiversity Collections. In: 2013 IEEE 9th International Conference on e-Science. 2013. p. 78–87.
3. Sullivan BL, Aycrigg JL, Barry JH, Bonney RE, Bruns N, Cooper CB, et al. The eBird enterprise: an integrated approach to development and application of citizen science. *Biol Conserv*. 2014;169:31–40.
4. Shaffer HB, Fisher RN, Davidson C. The role of natural history collections in documenting species declines. *Trends Ecol Evol*. 1998 Jan 1;13(1):27–30.
5. Ristaino JB. Tracking historic migrations of the Irish potato famine pathogen, *Phytophthora infestans*. *Microbes Infect*. 2002 Nov 1;4(13):1369–77.
6. Suarez AV, Tsutsui ND. The Value of Museum Collections for Research and Society. *BioScience*. 2004 Jan 1;54(1):66–74.
7. Graham CH, Ferrier S, Huettman F, Moritz C, Peterson AT. New developments in museum-based informatics and applications in biodiversity analysis. *Trends Ecol Evol*. 2004 Sep 1;19(9):497–503.
8. Pyke GH, Ehrlich PR. Biological collections and ecological/environmental research: a review, some observations and a look to the future. *Biol Rev*. 2010;85(2):247–266.
9. Baird RC. Leveraging the fullest potential of scientific collections through digitisation. *Biodivers Inform* [Internet]. 2010 Oct 9 [cited 2016 Aug 16];7(2). Available from: <https://journals.ku.edu/index.php/jbi/article/view/3987>
10. GBIF [Internet]. [cited 2019 Apr 5]. Available from: <https://www.gbif.org/>
11. Baker B. New Push to Bring US Biological Collections to the World’s Online Community Advances in technology put massive undertaking within reach. *BioScience*. 2011 Sep 1;61(9):657–62.
12. Blagoderov V, Kitching I, Livermore L, Simonsen T, Smith V. No specimen left behind: industrial scale digitization of natural history collections. *ZooKeys*. 2012 Jul 20;209:133–46.
13. Page LM, MacFadden BJ, Fortes JA, Soltis PS, Riccardi G. Digitization of Biodiversity Collections Reveals Biggest Data on Biodiversity. *BioScience*. 2015 Sep 1;65(9):841–2.

14. Ariño A. Putting your Finger upon the Simplest Data. *Biodivers Inf Sci Stand*. 2018 Jun 15;2:e26300.
15. Nelson G, Paul D, Riccardi G, Mast A. Five task clusters that enable efficient and effective digitization of biological collections. *ZooKeys*. 2012 Jul 20;209:19–45.
16. Tulig M, Tarnowsky N, Bevans M, Kirchgessner A, Thiers B. Increasing the efficiency of digitization workflows for herbarium specimens. *ZooKeys*. 2012 Jul 20;209:103–13.
17. Hudson LN, Blagoderov V, Heaton A, Holtzhausen P, Livermore L, Price BW, et al. Insect: Automating the Digitization of Natural History Collections. *PLOS ONE*. 2015 Nov 23;10(11):e0143402.
18. Allan EL, Livermore L, Price B, Shchedrina O, Smith V. A Novel Automated Mass Digitisation Workflow for Natural History Microscope Slides. *Biodivers Data J*. 2019 Jan 3;7:e32342.
19. Pimm SL, Jenkins CN, Abell R, Brooks TM, Gittleman JL, Joppa LN, et al. The biodiversity of species and their rates of extinction, distribution, and protection. *Science*. 2014 May 30;344(6187):1246752.
20. Alroy J. Current extinction rates of reptiles and amphibians. *Proc Natl Acad Sci*. 2015;112(42):13003–13008.
21. Régnier C, Achaz G, Lambert A, Cowie RH, Bouchet P, Fontaine B. Mass extinction in poorly known taxa. *Proc Natl Acad Sci*. 2015;112(25):7761–7766.
22. Faith D, Collen B, Ariño A, Koleff PKP, Guinotte J, Kerr J, et al. Bridging the biodiversity data gaps: Recommendations to meet users' data needs. *Biodivers Inform*. 2013;8(2). Available from: <https://journals.ku.edu/index.php/jbi/article/view/4126>
23. Ariño AH, Chavan V, Faith DP. Assessment of user needs of primary biodiversity data: Analysis, concerns, and challenges. *Biodivers Inform [Internet]*. 2013 Jul 9 [cited 2016 Nov 14];8(2). Available from: <https://journals.ku.edu/index.php/jbi/article/view/4094>
24. Guralnick R, Hill A. Biodiversity informatics: automated approaches for documenting global biodiversity patterns and processes. *Bioinformatics*. 2009 Feb 15;25(4):421–8.
25. Sousa-Baena MS, Garcia LC, Peterson AT. Knowledge behind conservation status decisions: data basis for “Data Deficient” Brazilian plant species. *Biol Conserv*. 2014;173:80–89.
26. Feeley K. Are We Filling the Data Void? An Assessment of the Amount and Extent of Plant Collection Records and Census Data Available for Tropical South America. *PLOS ONE*. 2015 Apr 30;10(4):1–17.

27. Meyer C, Kreft H, Guralnick R, Jetz W. Global priorities for an effective information basis of biodiversity distributions. *Nat Commun* [Internet]. 2015 Dec [cited 2018 May 24];6(1). Available from: <http://www.nature.com/articles/ncomms9221>
28. Beck J, Ballesteros-Mejia L, Buchmann CM, Dengler J, Fritz SA, Gruber B, et al. What's on the horizon for macroecology? *Ecography*. 2012 Aug 1;35(8):673–83.
29. Beck J, Ballesteros-Mejia L, Nagel P, Kitching IJ. Online solutions and the Wallacean shortfall what does GBIF contribute to our knowledge of species ranges? *Divers Distrib*. 2013;19(8):1043–1050.
30. Daru BH, Park DS, Primack RB, Willis CG, Barrington DS, Whitfeld TJS, et al. Widespread sampling biases in herbaria revealed from large-scale digitization. *New Phytol*. 2018 Jan 1;217(2):939–55.
31. Maldonado C, Molina CI, Zizka A, Persson C, Taylor CM, Alban J, et al. Estimating species diversity and distribution in the era of Big Data: to what extent can we trust public databases? *Glob Ecol Biogeogr*. 2015 Aug;24(8):973–84.
32. Meier R, Dikow T. Significance of Specimen Databases from Taxonomic Revisions for Estimating and Mapping the Global Species Diversity of Invertebrates and Repatriating Reliable Specimen Data. *Conserv Biol*. 2004 Apr 1;18(2):478–88.
33. Goodwin ZA, Harris DJ, Filer D, Wood JRI, Scotland RW. Widespread mistaken identity in tropical plant collections. *Curr Biol CB*. 2015 Nov 16;25(22):R1066-1067.
34. Zermoglio PF, Guralnick RP, Wieczorek JR. A Standardized Reference Data Set for Vertebrate Taxon Name Resolution. *PLOS ONE*. 2016 Jan 13;11(1):e0146894.
35. Wieczorek J, Guo Q, Hijmans R. The point-radius method for georeferencing locality descriptions and calculating associated uncertainty. *Int J Geogr Inf Sci*. 2004 Dec 1;18(8):745–67.
36. Dou L, Cao G, Morris PJ, Morris RA, Ludäscher B, Macklin JA, et al. Kurator: A Kepler package for data curation workflows. *Procedia Comput Sci*. 2012 Jan 1;9:1614–9.
37. Mathew C, Güntsch A, Obst M, Vicario S, Haines R, Williams A, et al. A semi-automated workflow for biodiversity data retrieval, cleaning, and quality control. *Biodivers Data J*. 2014;2:1–12.
38. Ponder W, Carter G, Flemons P, R. Chapman R. Evaluation of Museum Collection Data for Use in Biodiversity Assessment. *Conserv Biol*. 2001 Jun 1;15.
39. Boakes EH, McGowan PJ, Fuller RA, Chang-qing D, Clark NE, O'Connor K, et al. Distorted views of biodiversity: spatial and temporal bias in species occurrence data. *PLOS Biol*. 2010;8(6):e1000385.

40. Isaac NJ, Strien AJ, August TA, Zeeuw MP, Roy DB. Statistics for citizen science: extracting signals of change from noisy ecological data. *Methods Ecol Evol*. 2014;5(10):1052–1060.
41. Ruete A. Displaying bias in sampling effort of data accessed from biodiversity databases using ignorance maps. *Biodivers Data J*. 2015;(3):1–15.
42. Meyer C, Weigelt P, Kreft H. Multidimensional biases, gaps and uncertainties in global plant occurrence information. *Ecol Lett*. 2016 Aug 1;19(8):992–1006.
43. Meyer C, Jetz W, Guralnick RP, Fritz SA, Kreft H. Range geometry and socio-economics dominate species-level biases in occurrence information. *Glob Ecol Biogeogr*. 2016 Oct 1;25(10):1181–93.
44. Guralnick R, Van Cleve J. Strengths and weaknesses of museum and national survey data sets for predicting regional species richness: comparative and combined approaches. *Divers Distrib*. 2005 Jul 1;11(4):349–59.
45. Ball-Damerow JE, Oboyski PT, Resh VH. California dragonfly and damselfly (Odonata) database: temporal and spatial distribution of species records collected over the past century. *ZooKeys*. 2015;(482):67.
46. Rapacciuolo G, Ball-Damerow JE, Zeilinger AR, Resh VH. Detecting long-term occupancy changes in Californian odonates from natural history and citizen science records. *Biodivers Conserv*. 2017 Nov;26(12):2933–49.
47. Sierwald P, Bieler R, Shea EK, Rosenberg G. Mobilizing Mollusks: Status Update on Mollusk Collections in the U.S.A. and Canada. *Am Malacol Bull*. 2018 Dec;36(2):177–214.
48. ter Steege H, A. Persaud C. The phenology of Guyanese timber species—A compilation of a century of observations. *Plant Ecol*. 1991 Jan 9;95:177–98.
49. Peterson CH. Relative abundances of living and dead molluscs in two Californian lagoons. *Lethaia*. 1976 Apr 1;9(2):137–48.
50. Boag DA. Overcoming sampling bias in studies of terrestrial gastropods. *Can J Zool*. 1982 Jun;60(6):1289–92.
51. Dorazio RM. Accounting for imperfect detection and survey bias in statistical analysis of presence-only data. *Glob Ecol Biogeogr*. 2014 Dec 1;23(12):1472–84.
52. Zeilinger AR, Rapacciuolo G, Turek D, Oboyski PT, Almeida RPP, Roderick GK. Museum specimen data reveal emergence of a plant disease may be linked to increases in the insect vector population. *Ecol Appl Publ Ecol Soc Am*. 2017 Sep;27(6):1827–37.

53. Chapman AD. Uses of Primary Species-Occurrence Data, version 1.0. Report for the Global Biodiversity Information Facility. [Internet]. Copenhagen; 2005. Available from: [Http://www.gbif.org/orc/?doc\\_id=1300](Http://www.gbif.org/orc/?doc_id=1300).
54. Ariño A, Noesgaard D, Hjarding A, Schigel D. Biodiversity Information Services: A (not-so-) little knowledge that acts. *Biodivers Inf Sci Stand*. 2018 May 22;2:e25738.
55. Roy Rosenzweig Center for History and New Media. Zotero [Internet]. 2017. Available from: [www.zotero.org/download](http://www.zotero.org/download)
56. Ball-Damerow JE, Brenskelle L, Barve N, LaFrance R, Soltis PS, Sierwald P, et al. Bibliographic dataset characterizing studies that use online biodiversity databases [Internet]. Zenodo; 2019 [cited 2019 Mar 13]. Available from: <https://zenodo.org/record/2589439#.XIE5RNKjBI>
57. Chavan V, Penev L. The data paper: a mechanism to incentivize data publishing in biodiversity science. *BMC Bioinformatics*. 2011;12(15):S2.
58. Moritz T, Krishnan S, Roberts D, Ingwersen P, Agosti D, Penev L, et al. Towards mainstreaming of biodiversity data publishing: recommendations of the GBIF Data Publishing Framework Task Group. *BMC Bioinformatics*. 2011;12(15):S1.
59. Whitlock MC. Data archiving in ecology and evolution: best practices. *Trends Ecol Evol*. 2011 Feb;26(2):61–5.
60. Smith V, Penev L. E-Infrastructures for Data Publishing in Biodiversity Science. PenSoft Publishers LTD; 2011. 425 p.
61. Costello MJ, Michener WK, Gahegan M, Zhang Z-Q, Bourne PE. Biodiversity data should be published, cited, and peer reviewed. *Trends Ecol Evol*. 2013 Aug;28(8):454–61.
62. Costello MJ, Wieczorek J. Best practice for biodiversity data management and publication. *Biol Conserv*. 2014 May 1;173:68–73.
63. Wilkinson MD, Dumontier M, Aalbersberg IJ, Appleton G, Axton M, Baak A, et al. The FAIR Guiding Principles for scientific data management and stewardship. *Sci Data*. 2016 Mar 15;3:160018.
64. Mooney H, Newton M. The Anatomy of a Data Citation: Discovery, Reuse, and Credit. *J Librariansh Sch Commun*. 2012 May 15;1(1):eP1035.
65. Escribano N, Galicia D, Ariño AH. The tragedy of the biodiversity data commons: a data impediment creeping nigher? *Database J Biol Databases Curation*. 2018 Apr 9 [cited 2018 Dec 24];2018. Available from: <https://www.ncbi.nlm.nih.gov/pmc/articles/PMC5892138/>

66. Vines TH, Albert AYK, Andrew RL, Débarre F, Bock DG, Franklin MT, et al. The Availability of Research Data Declines Rapidly with Article Age. *Curr Biol*. 2014 Jan 6;24(1):94–7.
67. Klump J, Huber R. 20 Years of Persistent Identifiers – Which Systems are Here to Stay? *Data Sci J*. 2017 Mar 22;16(0):9.
68. McMurry JA, Juty N, Blomberg N, Burdett T, Conlin T, Conte N, et al. Identifiers for the 21st century: How to design, provision, and reuse persistent identifiers to maximize utility and impact of life science data. *PLOS Biol*. 2017 Jun 29;15(6):e2001414.
69. Stark PB. Before reproducibility must come preproducibility. *Nature*. 2018 May 24;557:613.
70. Cousijn H, Kenall A, Ganley E, Harrison M, Kernohan D, Lemberger T, et al. A data citation roadmap for scientific publishers. *Sci Data*. 2018 Nov 20;5:180259.
71. Force MM, Robinson NJ. Encouraging data citation and discovery with the Data Citation Index. *J Comput Aided Mol Des*. 2014 Oct;28(10):1043–8.
72. Costello MJ, Appeltans W, Bailly N, Berendsohn WG, de Jong Y, Edwards M, et al. Strategies for the sustainability of online open-access biodiversity databases. *Biol Conserv*. 2014;173:155–165.
73. Huang X, Hawkins BA, Qiao G. Biodiversity data sharing: Will peer-reviewed data papers work? *BioScience*. 2013;63(1):5–6.
74. Pimm SL, Alibhai S, Bergl R, Dehgan A, Giri C, Jewell Z, et al. Emerging Technologies to Conserve Biodiversity. *Trends Ecol Evol*. 2015 Nov 1;30(11):685–96.
75. Wood KR. Rediscovery, conservation status and taxonomic assessment of *Melicope degeneri* (Rutaceae), Kaua ‘i, Hawai ‘i. *Endanger Species Res*. 2011;14(1):61–68.
76. Costello MJ. Motivating Online Publication of Data. *BioScience*. 2009 May 1;59(5):418–27.
77. Costello MJ, Bouchet P, Boxshall G, Fauchald K, Gordon D, Hoeksema BW, et al. Global coordination and standardisation in marine biodiversity through the World Register of Marine Species (WoRMS) and related databases. *PLOS ONE*. 2013;8(1):e51629.
78. Tydecks L, Jeschke JM, Wolf M, Singer G, Tockner K. Spatial and topical imbalances in biodiversity research. *PLOS ONE*. 2018 Jul 5;13(7):e0199327.
79. Chapman AD. Numbers of Living Species in Australia and the World: A Report for the Australian Biological Resources Study [Internet]. Toowoomba, Australia: Australian Government Department of the Environment and Energy; 2009. Report No.: ISBN: 978 0 642 56861 8. Available from:

<http://www.environment.gov.au/science/abrs/publications/other/numbers-living-species/contents#copyright>

80. Sánchez-Fernández D, Lobo JM, Abellán P, Ribera I, Millán A. Bias in freshwater biodiversity sampling: the case of Iberian water beetles. *Divers Distrib.* 2008 Sep 1;14(5):754–62.
81. Ballesteros-Mejia L, Kitching IJ, Jetz W, Nagel P, Beck J. Mapping the biodiversity of tropical insects: species richness and inventory completeness of African sphingid moths. *Glob Ecol Biogeogr.* 2013 May 1;22(5):586–95.
82. Costello MJ, Wilson S, Houlding B. Predicting total global species richness using rates of species description and estimates of taxonomic effort. *Syst Biol.* 2012 Oct;61(5):871–83.
83. Rosenberg G. A New Critical Estimate of Named Species-Level Diversity of the Recent Mollusca\*. *Am Malacol Bull.* 2014 Sep;32(2):308–22.
84. Schuh RT, Hewson-Smith S, Ascher JS. Specimen databases: A case study in entomology using web-based software. *Am Entomol.* 2010;56(4):206–216.
85. Mantle B, LaSalle J, Fisher N. Whole-drawer imaging for digital management and curation of a large entomological collection. *ZooKeys.* 2012 Jul 20;209:147–63.
86. Holovachov O, Zatushevsky A, Shydlovsky I. Whole-Drawer Imaging of Entomological Collections: Benefits, Limitations and Alternative Applications. *J Conserv Mus Stud.* 2014 Oct 29;12(1):Art. 9.
87. Hereld M, Ferrier NJ, Agarwal N, Sierwald P. Designing a High-Throughput Pipeline for Digitizing Pinned Insects. In: 2017 IEEE 13th International Conference on e-Science (e-Science). 2017. p. 542–50.
88. Price BW, Dupont S, Allan EL, Blagoderov V, Butcher AJ, Durrant J, et al. ALICE: Angled Label Image Capture and Extraction for high throughput insect specimen digitisation. 2018 Nov 5 [cited 2019 Mar 13]; Available from: <https://osf.io/9p4f6/>
89. Hoffmann M, Hilton-Taylor C, Angulo A, Böhm M, Brooks TM, Butchart SHM, et al. The Impact of Conservation on the Status of the World's Vertebrates. *Science.* 2010 Dec 10;330(6010):1503–9.
90. Pino-del-Carpio A, Ariño AH, Miranda R. Data exchange gaps in knowledge of biodiversity: implications for the management and conservation of Biosphere Reserves. *Biodivers Conserv.* 2014;23(9):2239–2258.
91. Pino-Del-Carpio A, Villarroya A, Ariño AH, Puig J, Miranda R. Communication gaps in knowledge of freshwater fish biodiversity: implications for the management and conservation of Mexican biosphere reserves. *J Fish Biol.* 2011 Dec;79(6):1563–91.



92. Ball J, Beche L, Mendez P, H. Resh V. Biodiversity in Mediterranean-climate streams of California. *Hydrobiologia*. 2013 Nov 1;719.
93. Dewalt E, Favret C, W. Webb D. Just how imperiled are aquatic insects? A case study of stoneflies (Plecoptera) in Illinois. *Ann Entomol Soc Am*. 2005 Oct 31;98:941–50.
94. Ball-Damerow JE, M’Gonigle LK, Resh VH. Changes in occurrence, richness, and biological traits of dragonflies and damselflies (Odonata) in California and Nevada over the past century. *Biodivers Conserv*. 2014 Jul 1;23(8):2107–26.
95. Colla SR, Gadallah F, Richardson L, Wagner D, Gall L. Assessing declines of North American bumble bees (*Bombus* spp.) using museum specimens. *Biodivers Conserv*. 2012;21(14):3585–3595.
96. Hallmann CA, Sorg M, Jongejans E, Siepel H, Hofland N, Schwan H, et al. More than 75 percent decline over 27 years in total flying insect biomass in protected areas. *PLOS ONE*. 2017 Oct 18;12(10):e0185809.
97. Escribano N, Ariño AH, Galicia D. Biodiversity data obsolescence and land uses changes. *PeerJ*. 2016;4:1–15.
98. Peterson AT, Soberón J, Krishtalka L. A global perspective on decadal challenges and priorities in biodiversity informatics. *BMC Ecol*. 2015;15(1):15.
99. Austin M, Van Niel K. Improving species distribution models for climate change studies: Variable selection and scale. *J Biogeogr*. 2010 Nov 9;38:1–8.
100. Stanton JC, Pearson RG, Horning N, Ersts P, Reşit Akçakaya H. Combining static and dynamic variables in species distribution models under climate change. *Methods Ecol Evol*. 2012;3(2):349–357.
101. Fournier A, Barbet-Massin M, Rome Q, Courchamp F. Predicting species distribution combining multi-scale drivers. *Glob Ecol Conserv*. 2017 Oct 1;12:215–26.
102. Staniczenko PPA, Sivasubramaniam P, Suttle KB, Pearson RG. Linking macroecology and community ecology: refining predictions of species distributions using biotic interaction networks. *Ecol Lett*. 2017 Jun 1;20(6):693–707.
103. Ratnasingham S, Hebert PDN. bold: The Barcode of Life Data System (<http://www.barcodinglife.org>). *Mol Ecol Notes*. 2007 May 1;7(3):355–64.
104. Bold Systems v4 [Internet]. [cited 2019 Apr 5]. Available from: <http://www.boldsystems.org/>
105. Hinchliff CE, Smith SA, Allman JF, Burleigh JG, Chaudhary R, Coghill LM, et al. Synthesis of phylogeny and taxonomy into a comprehensive tree of life. *Proc Natl Acad Sci*. 2015 Oct 13;112(41):12764–9.

106. Chavan V, Berents P, Hamer M. Towards demand driven publishing: approaches to the prioritisation of digitisation of natural history collections data. *Biodivers Inform* [Internet]. 2010 Oct 9 [cited 2016 Aug 23];7(2). Available from: <https://journals.ku.edu/index.php/jbi/article/view/3990>
107. Rios, N. E., Bart, HL. GEOLocate. Belle Chasse, LA: Tulane University Museum of Natural History. Available from: <http://www.geo-locate.org>
108. Boyle B, Hopkins N, Lu Z, Raygoza Garay JA, Mozzherin D, Rees T, et al. The taxonomic name resolution service: an online tool for automated standardization of plant names. *BMC Bioinformatics*. 2013;14(1):16.
109. Chamberlain SA, Szöcs E. taxize: taxonomic search and retrieval in R. *F1000Research* [Internet]. 2013 Oct 28 [cited 2018 Oct 10];2. Available from: <https://www.ncbi.nlm.nih.gov/pmc/articles/PMC3901538/>
110. Froese R, Pauly D. FishBase. World Wide Web electronic publication. 2014 Jan 2 [cited 2019 Mar 27]; Available from: <https://www.scienceopen.com/document?vid=dc419213-0ca3-48cc-901c-2934ecf4441e>
111. WoRMS Editorial Board. World Register of Marine Species. Available from <http://www.marinespecies.org> at VLIZ. Accessed yyyy-mm-dd. [Internet]. VLIZ; 2017 [cited 2019 Apr 5]. Available from: <http://www.marinespecies.org/imis.php?dasid=1447&doiid=170>
112. MilliBase [Internet]. [cited 2019 Apr 2]. Available from: <http://www.millibase.org/>
113. MolluscaBase - Introduction [Internet]. [cited 2019 Apr 2]. Available from: <http://www.molluscabase.org/>
114. Ball-Damerow JE, Mendez PK, Sierwald P, Bieler R, Yoder M, DeWalt RE. Taxonomic data quality in GBIF: a case study of aquatic macroinvertebrate groups. In Ann Arbor, MI; 2017.
115. Wägele H, Klussmann-Kolb A, Kuhlmann M, Haszprunar G, Lindberg D, Koch A, et al. The taxonomist - an endangered race. A practical proposal for its survival. *Front Zool*. 2011 Oct 26;8:25.
116. Drew LW. Are We Losing the Science of Taxonomy?: As need grows, numbers and training are failing to keep up. *BioScience*. 2011 Dec;61(12):942–6.
117. Vaidya G, Lepage D, Guralnick R. The tempo and mode of the taxonomic correction process: How taxonomists have corrected and recorrected North American bird species over the last 127 years. *PLoS ONE* [Internet]. 2018 Apr 19 [cited 2019 Mar 27];13(4). Available from: <https://www.ncbi.nlm.nih.gov/pmc/articles/PMC5909608/>

118. Arvanitidis CD, Warwick RM, Somerfield PJ, Pavlouidi C, Pafilis E, Oulas A, et al. Research Infrastructures offer capacity to address scientific questions never attempted before: Are all taxa equal? PeerJ Inc.; 2018 Aug [cited 2019 Mar 27]. Report No.: e26819v2. Available from: <https://peerj.com/preprints/26819>
119. Otegui J, Guralnick RP. The geospatial data quality REST API for primary biodiversity data. *Bioinformatics*. 2016;32(11):1755–1757.
120. Paul D, Fisher N. Challenges For Implementing Collections Data Quality Feedback: synthesizing the community experience. *Biodivers Inf Sci Stand*. 2018 Jun 13; 2:e26003.

## SUPPORTING INFORMATION

**Supplemental Table 1.** Description of tags used to characterize papers, and number of papers assigned to each tag.

**Supplemental Table 2.** Online biodiversity databases cited in published research and information on database scale, accessibility, and subject focus of the database (region, institution, and/or taxa included).

**Supplemental File 1.** File in csv format containing citation information for 501 relevant journal articles analyzed in this review.

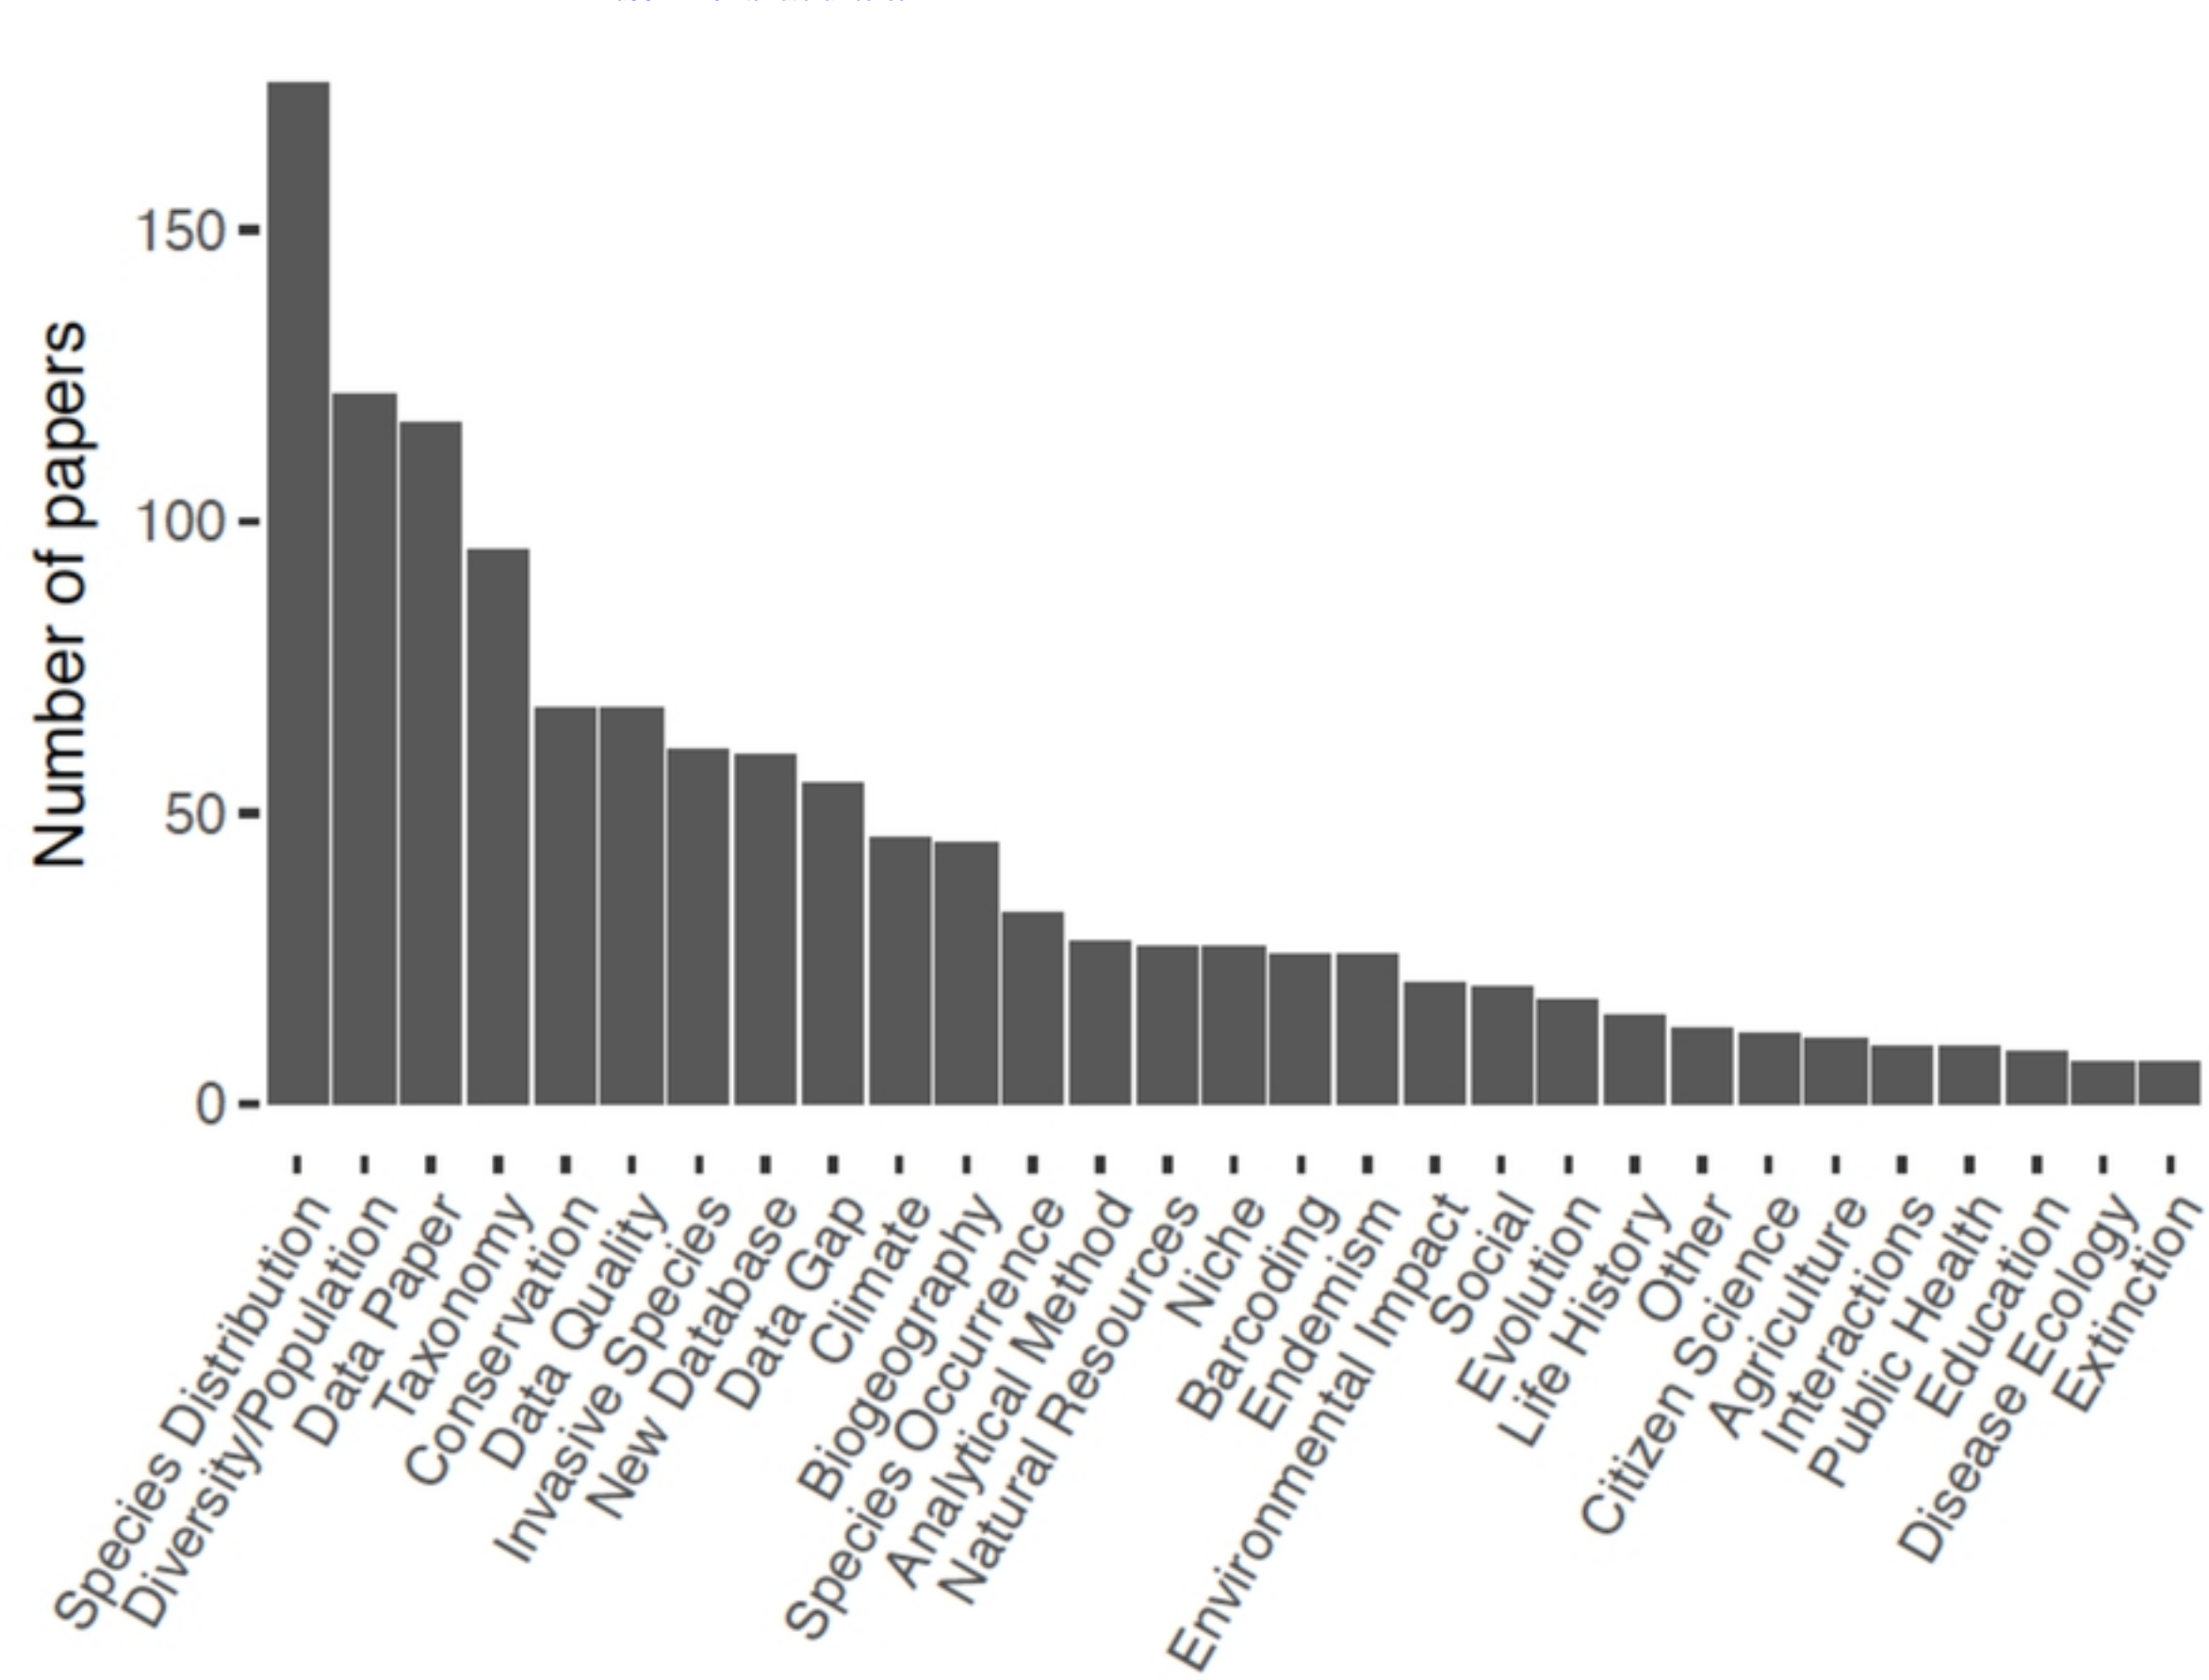

Figure 1

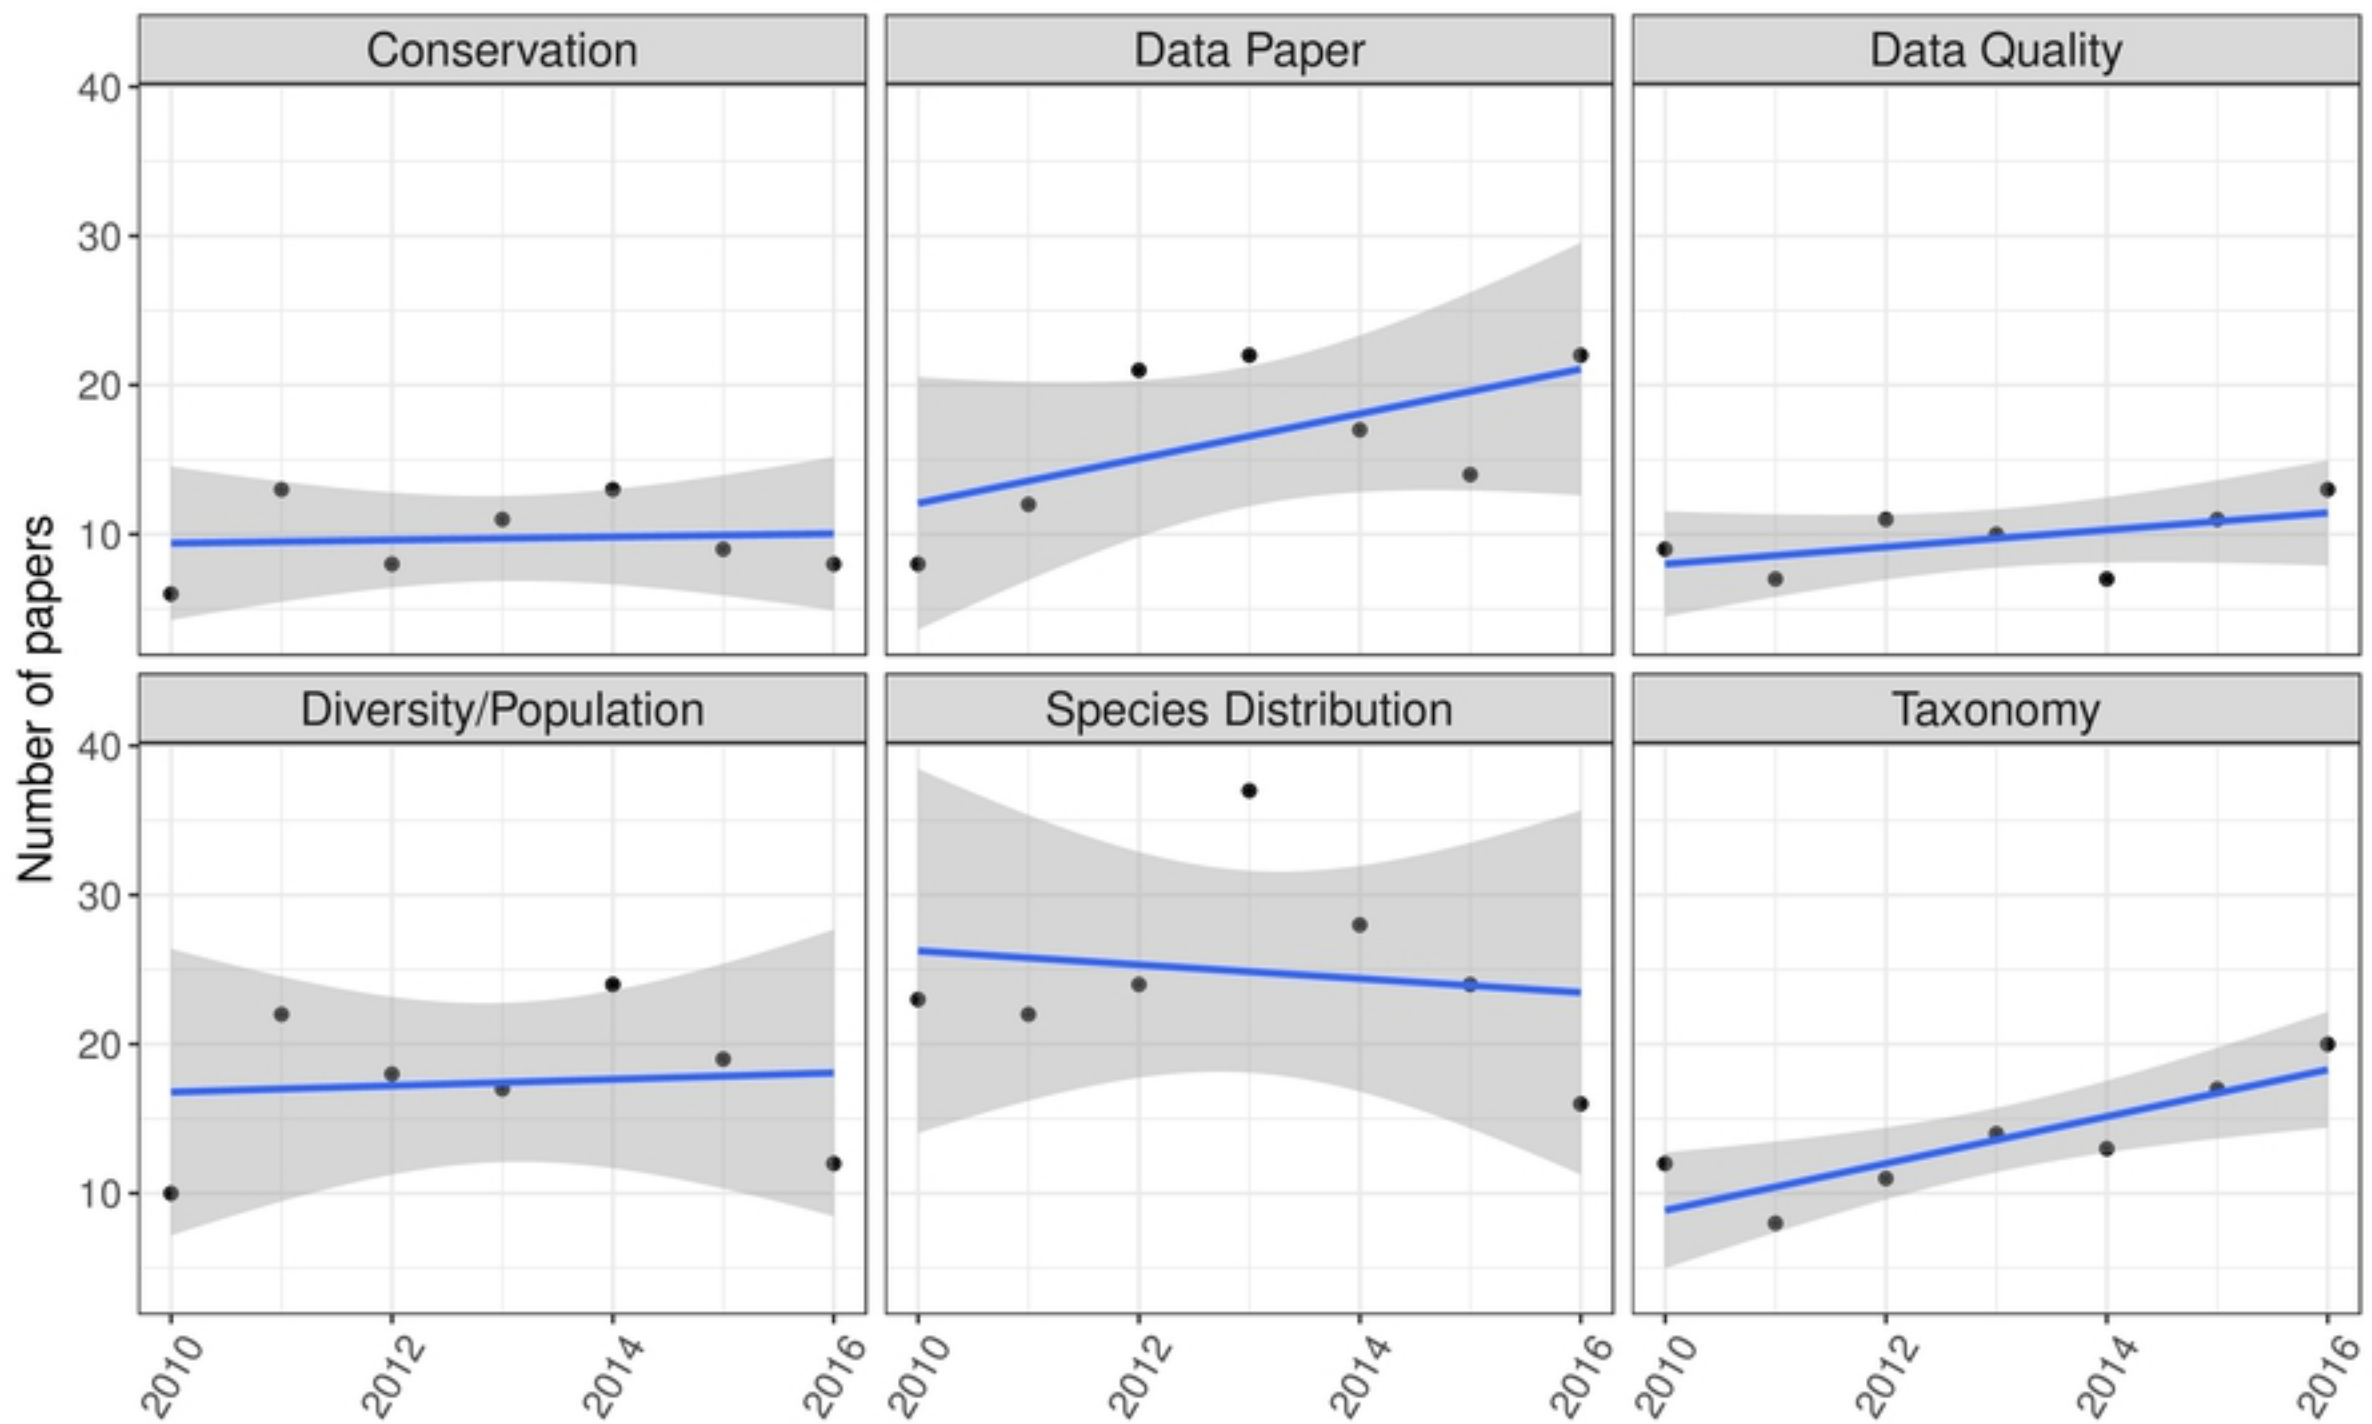

Figure 2

bioRxiv preprint doi: <https://doi.org/10.1101/605071>; this version posted April 10, 2019. The copyright holder for this preprint (which was not certified by peer review) is the author/funder, who has granted bioRxiv a license to display the preprint in perpetuity. It is made available under aCC-BY 4.0 International license.

Number of papers

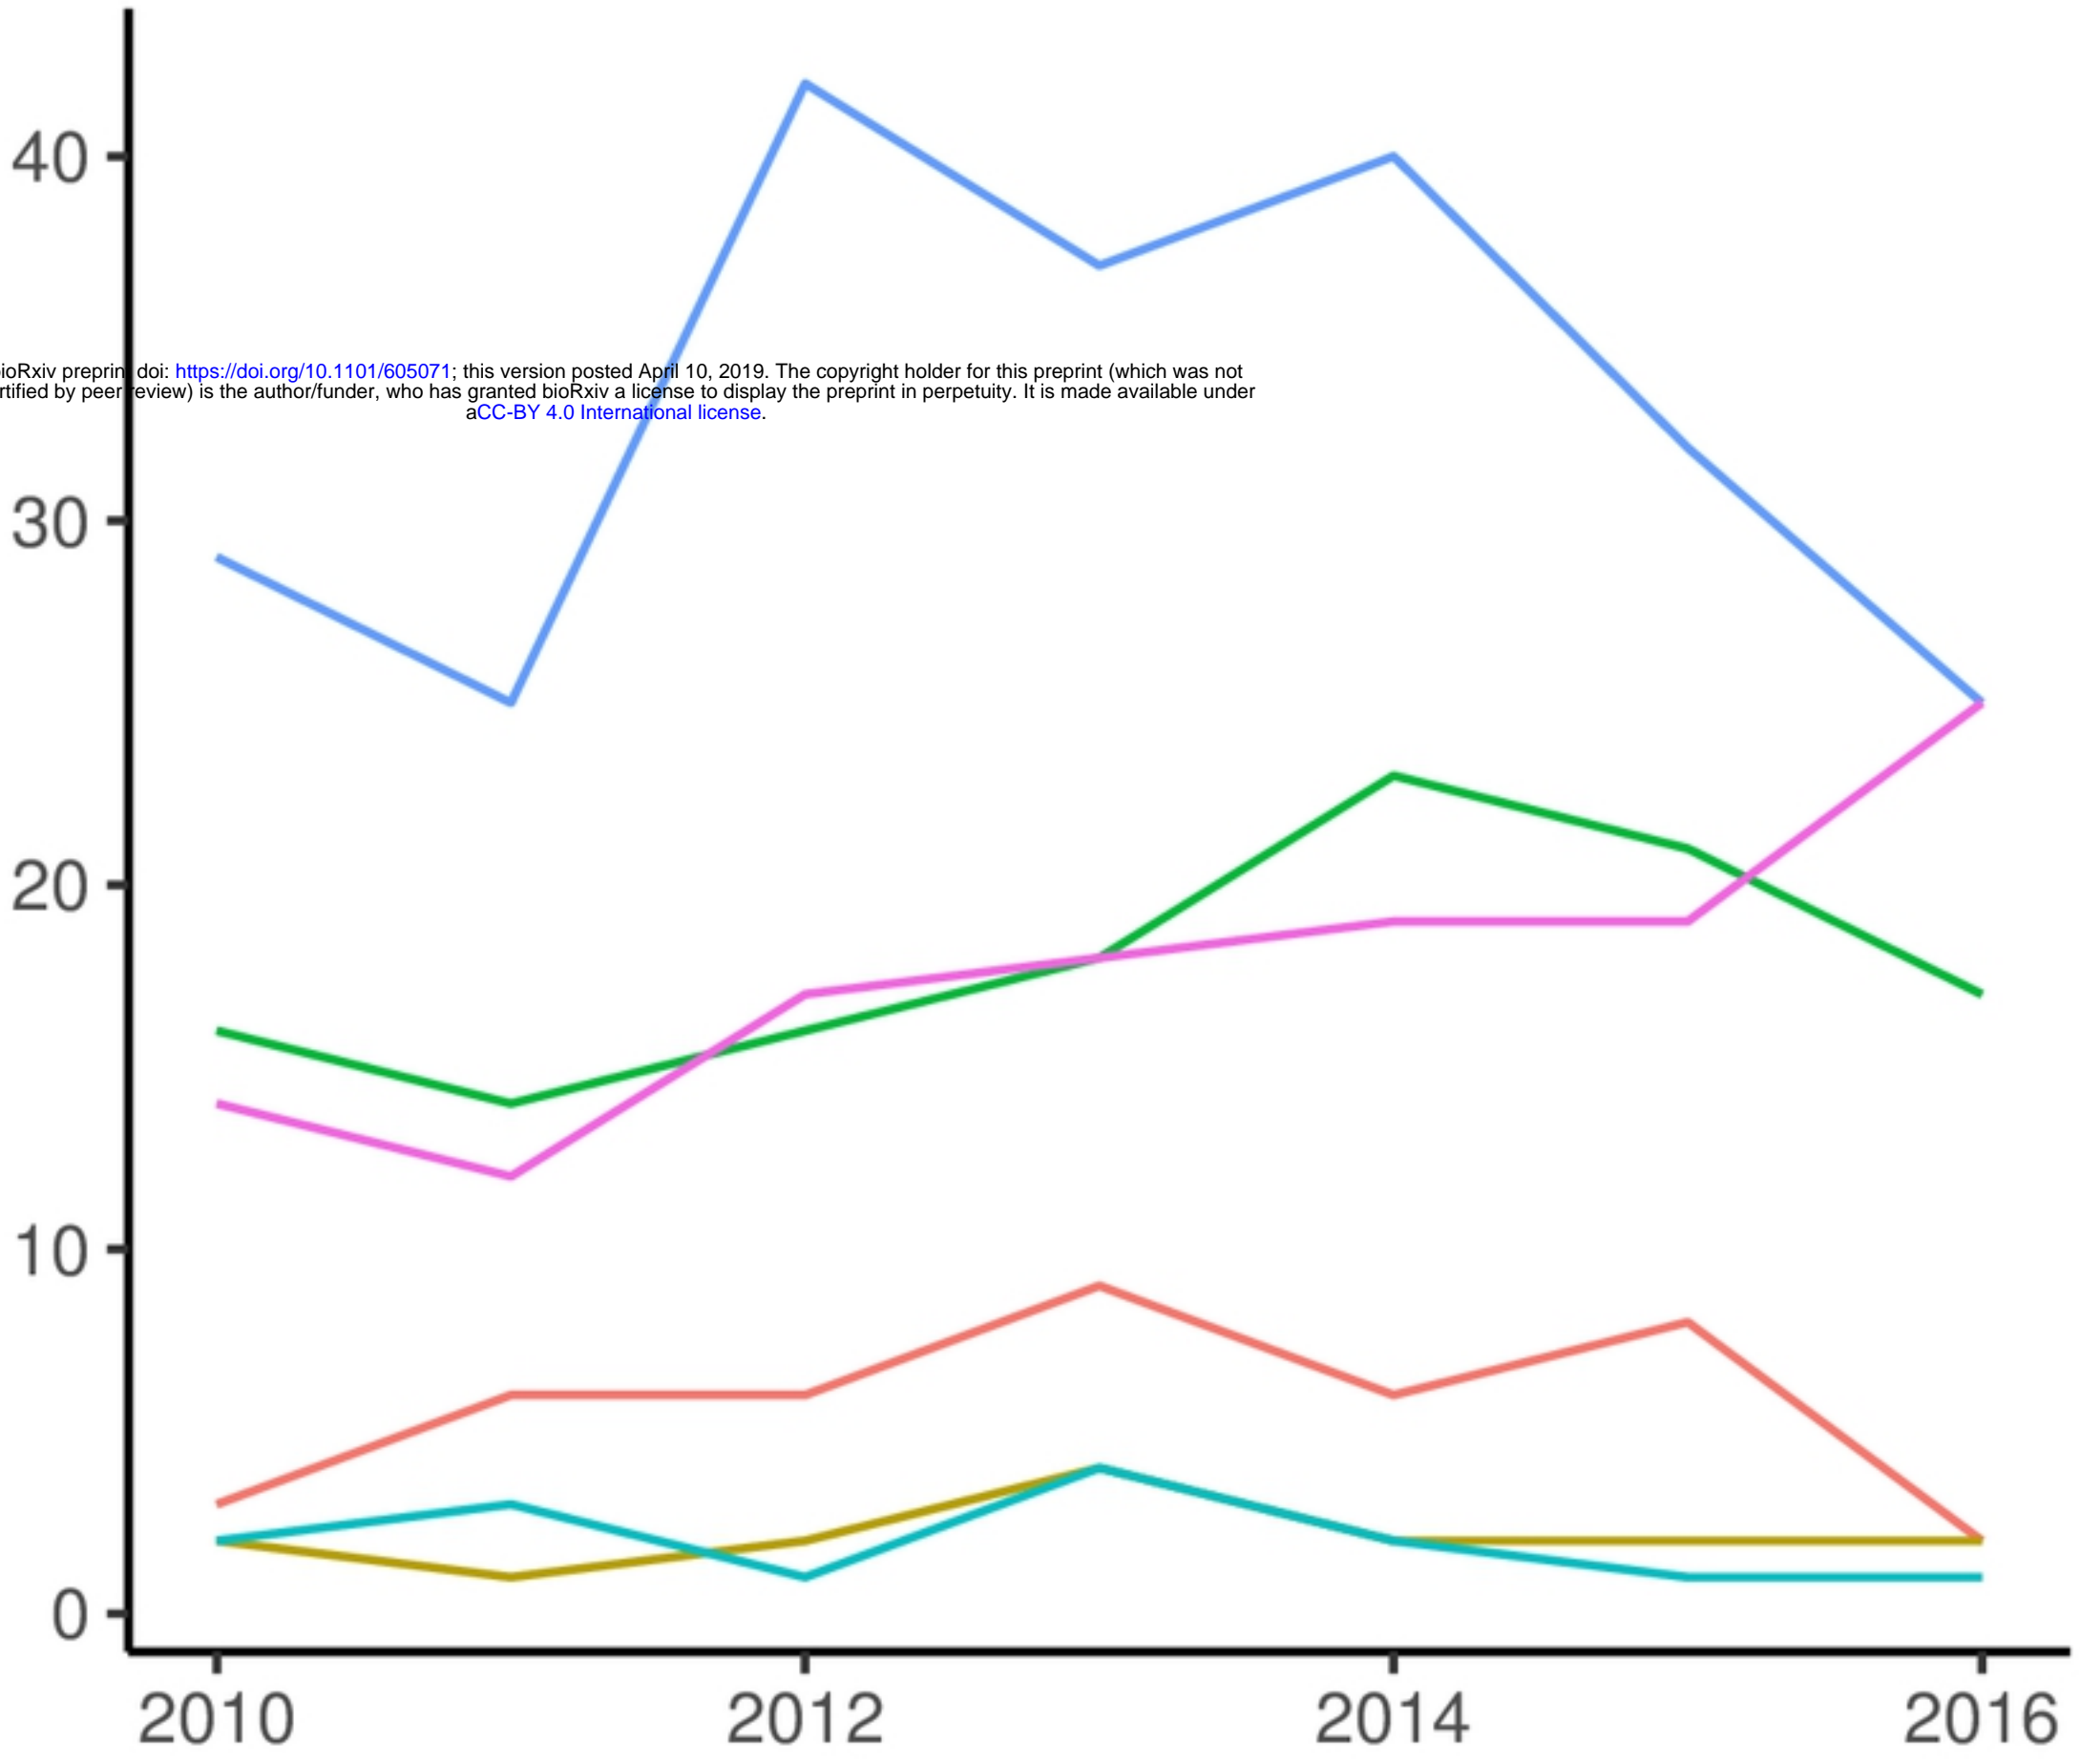

— Plants — Vertebrates — Fungi  
— Invertebrates — All — Paleo

Figure 3

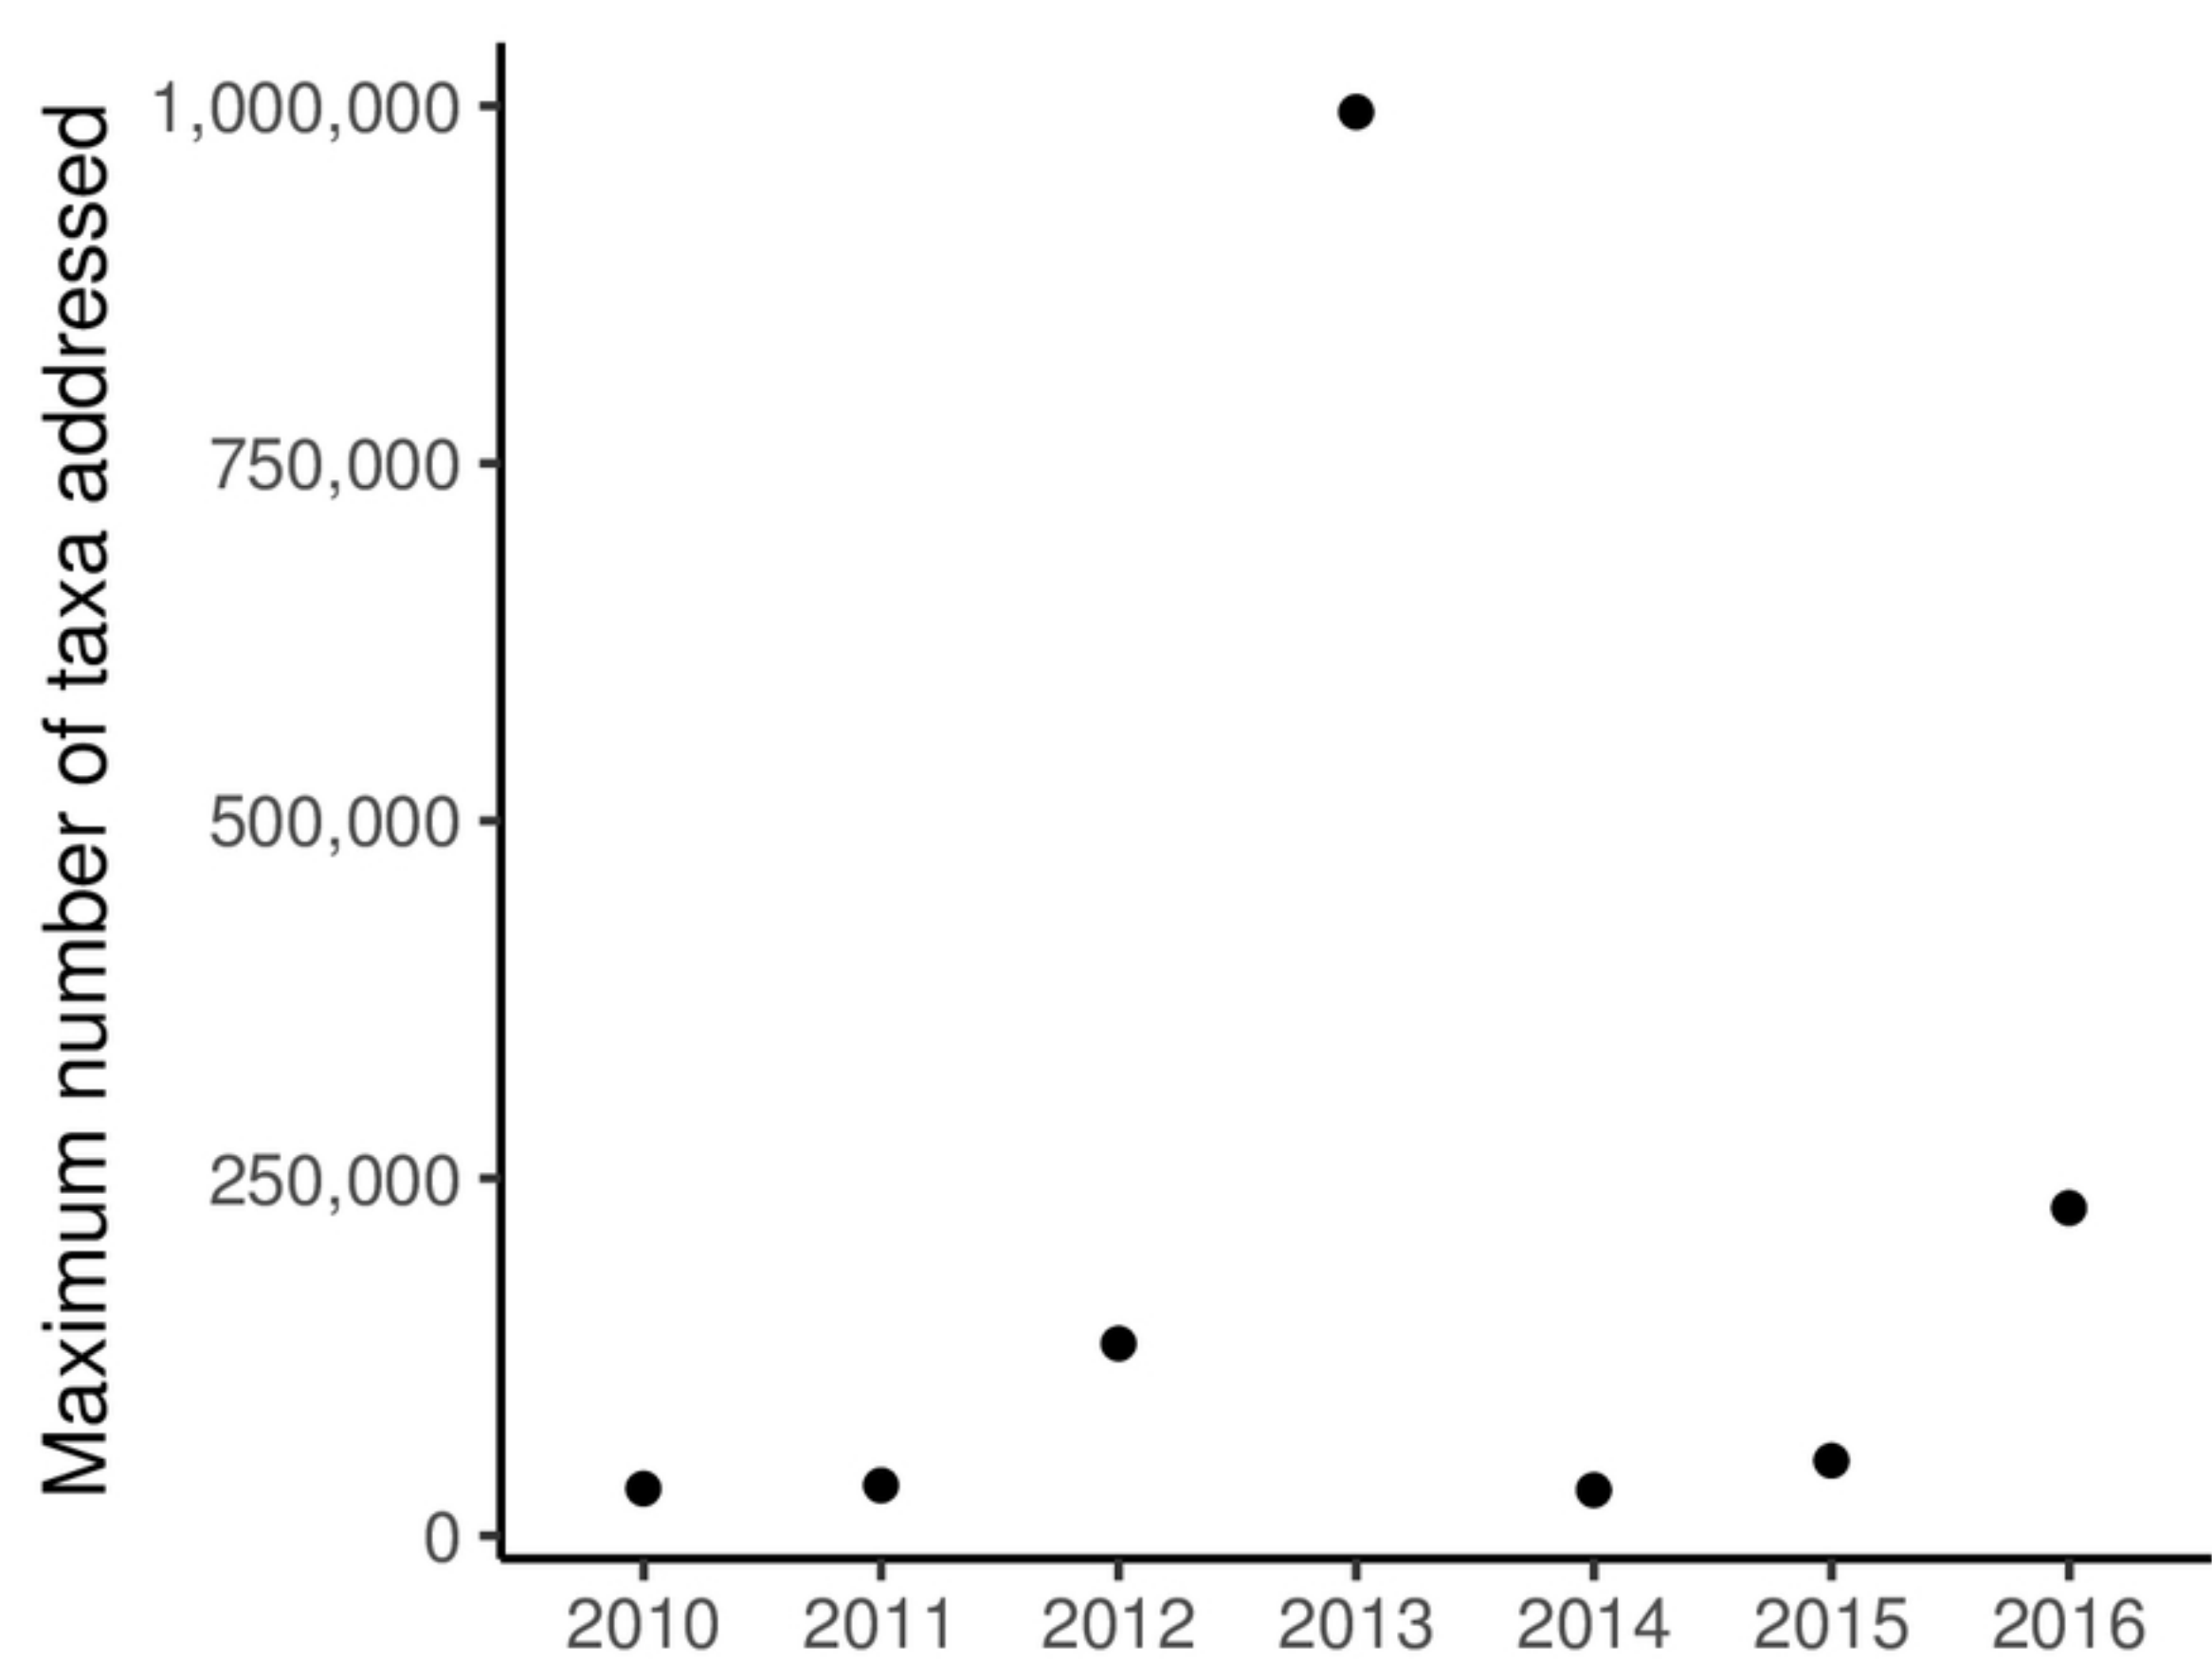

Figure 4



Percentage of papers

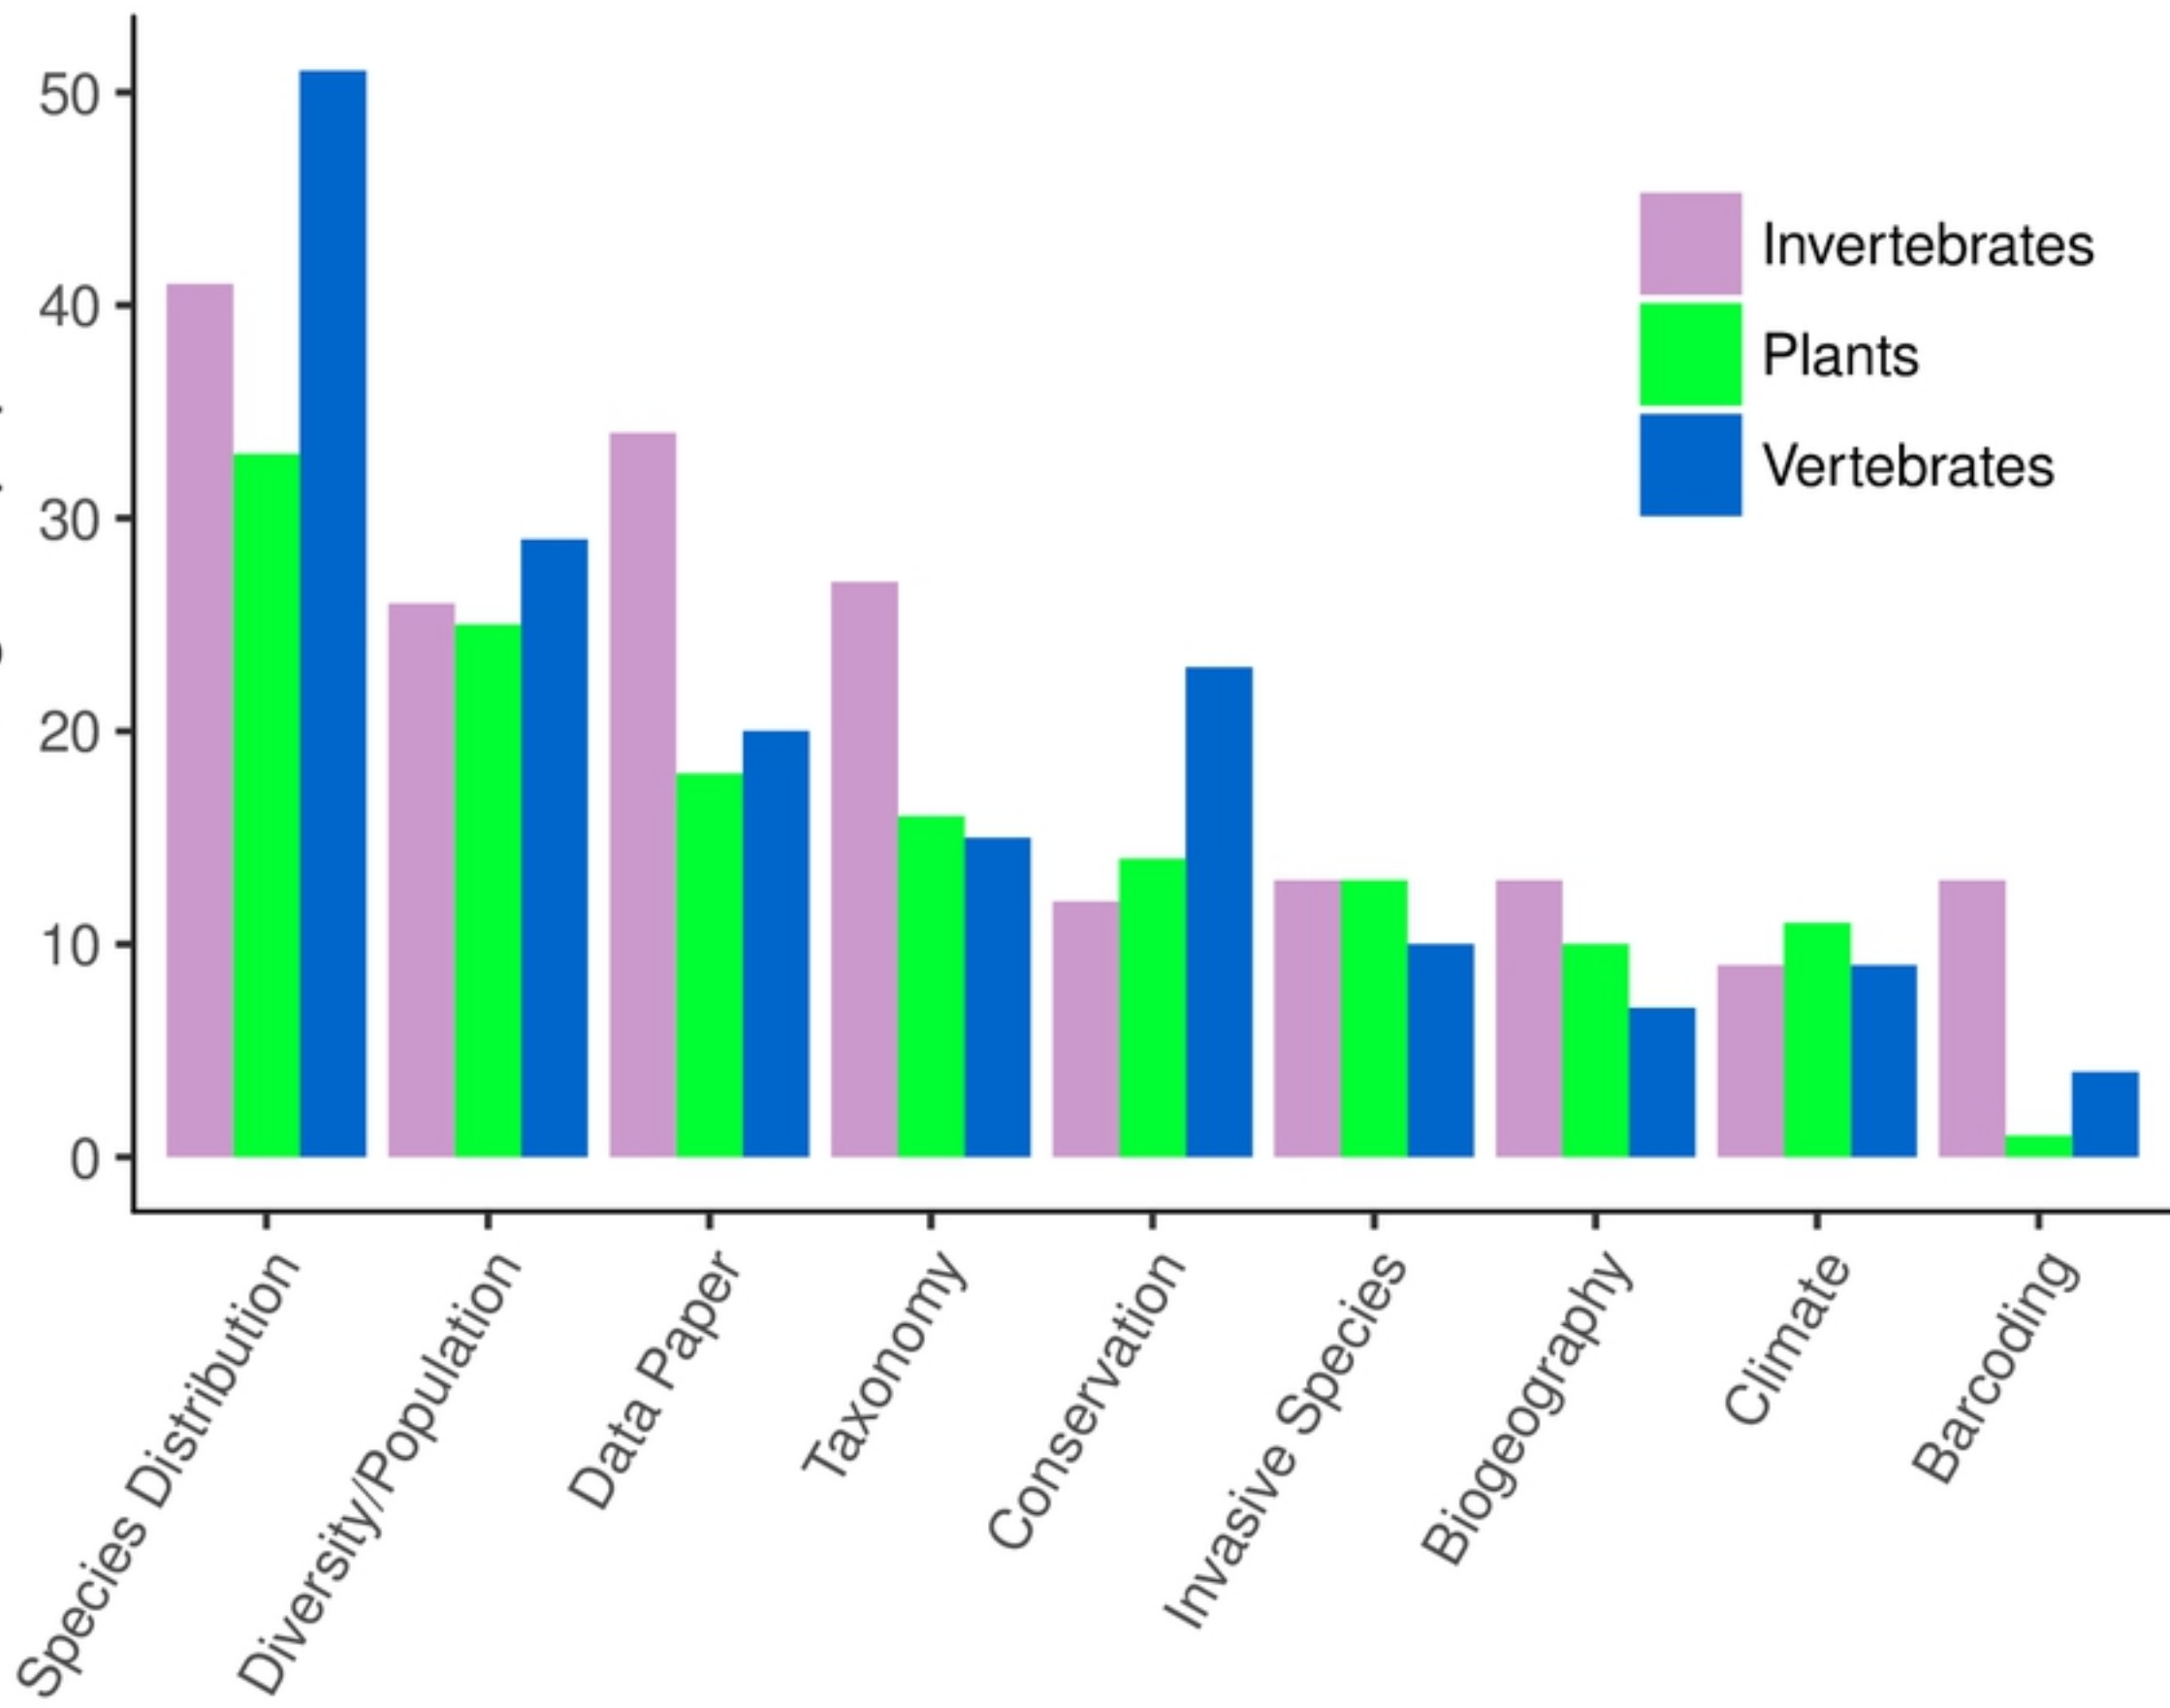

Figure 5

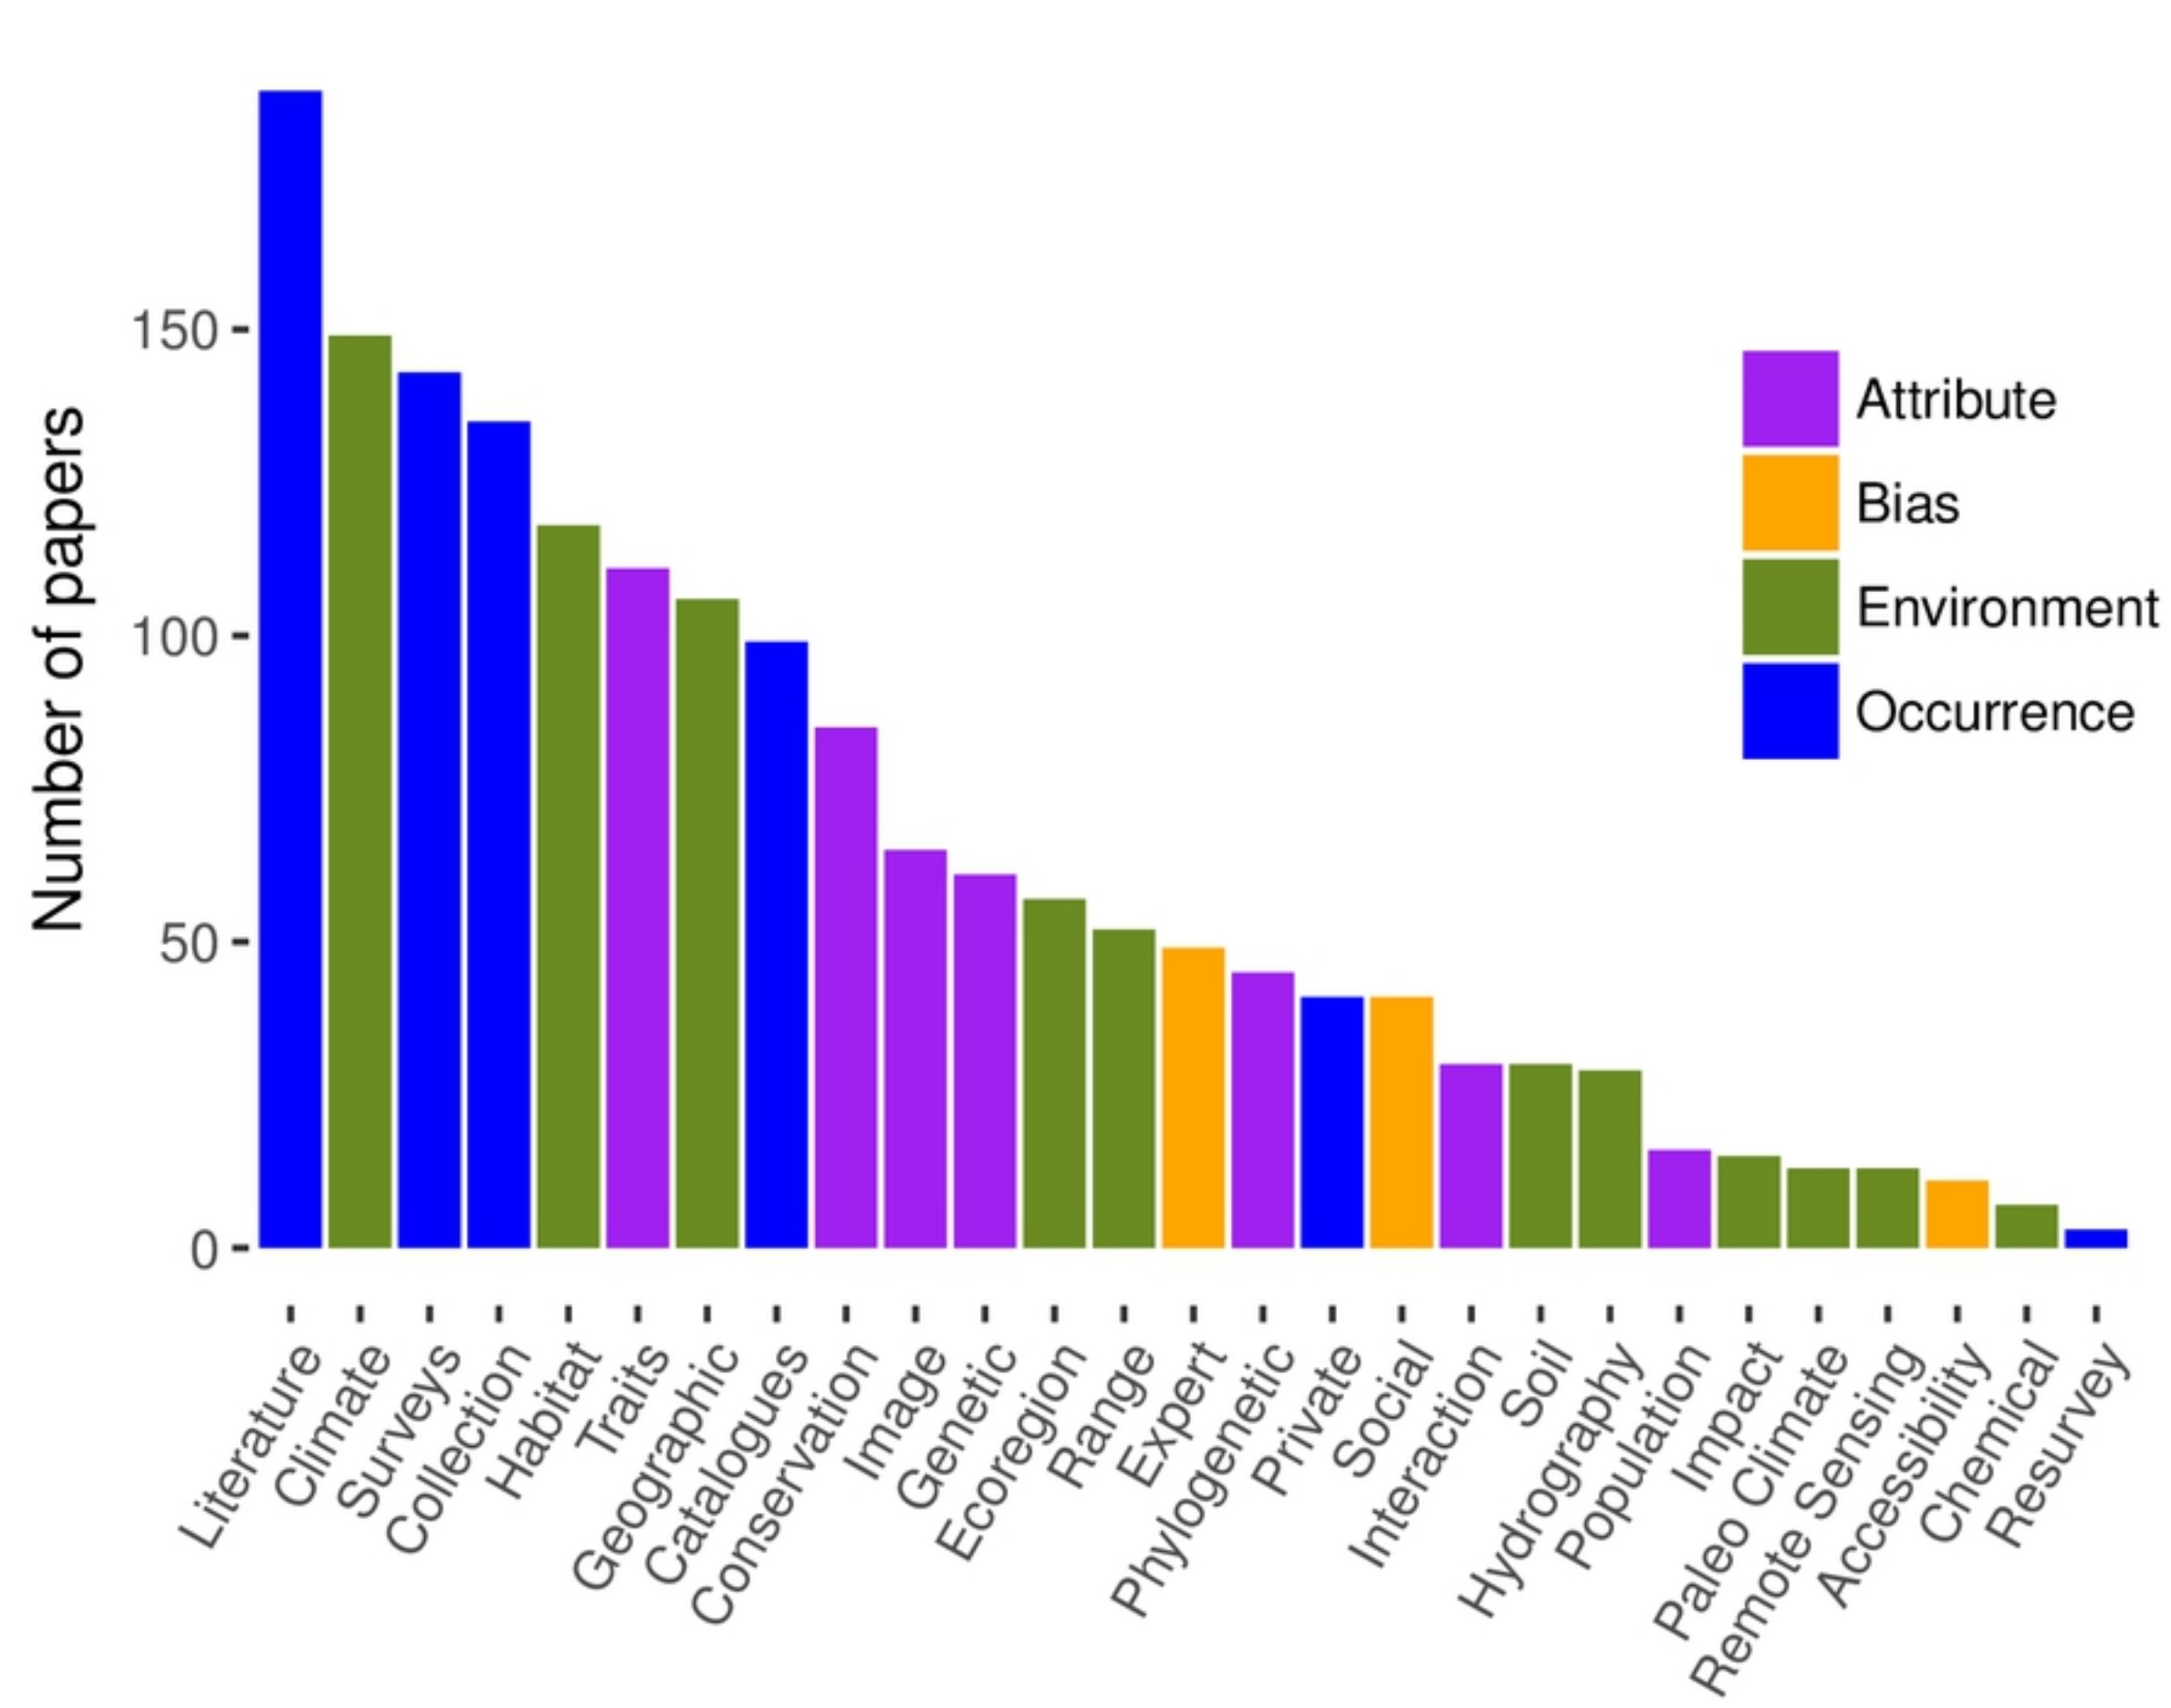

Figure 6

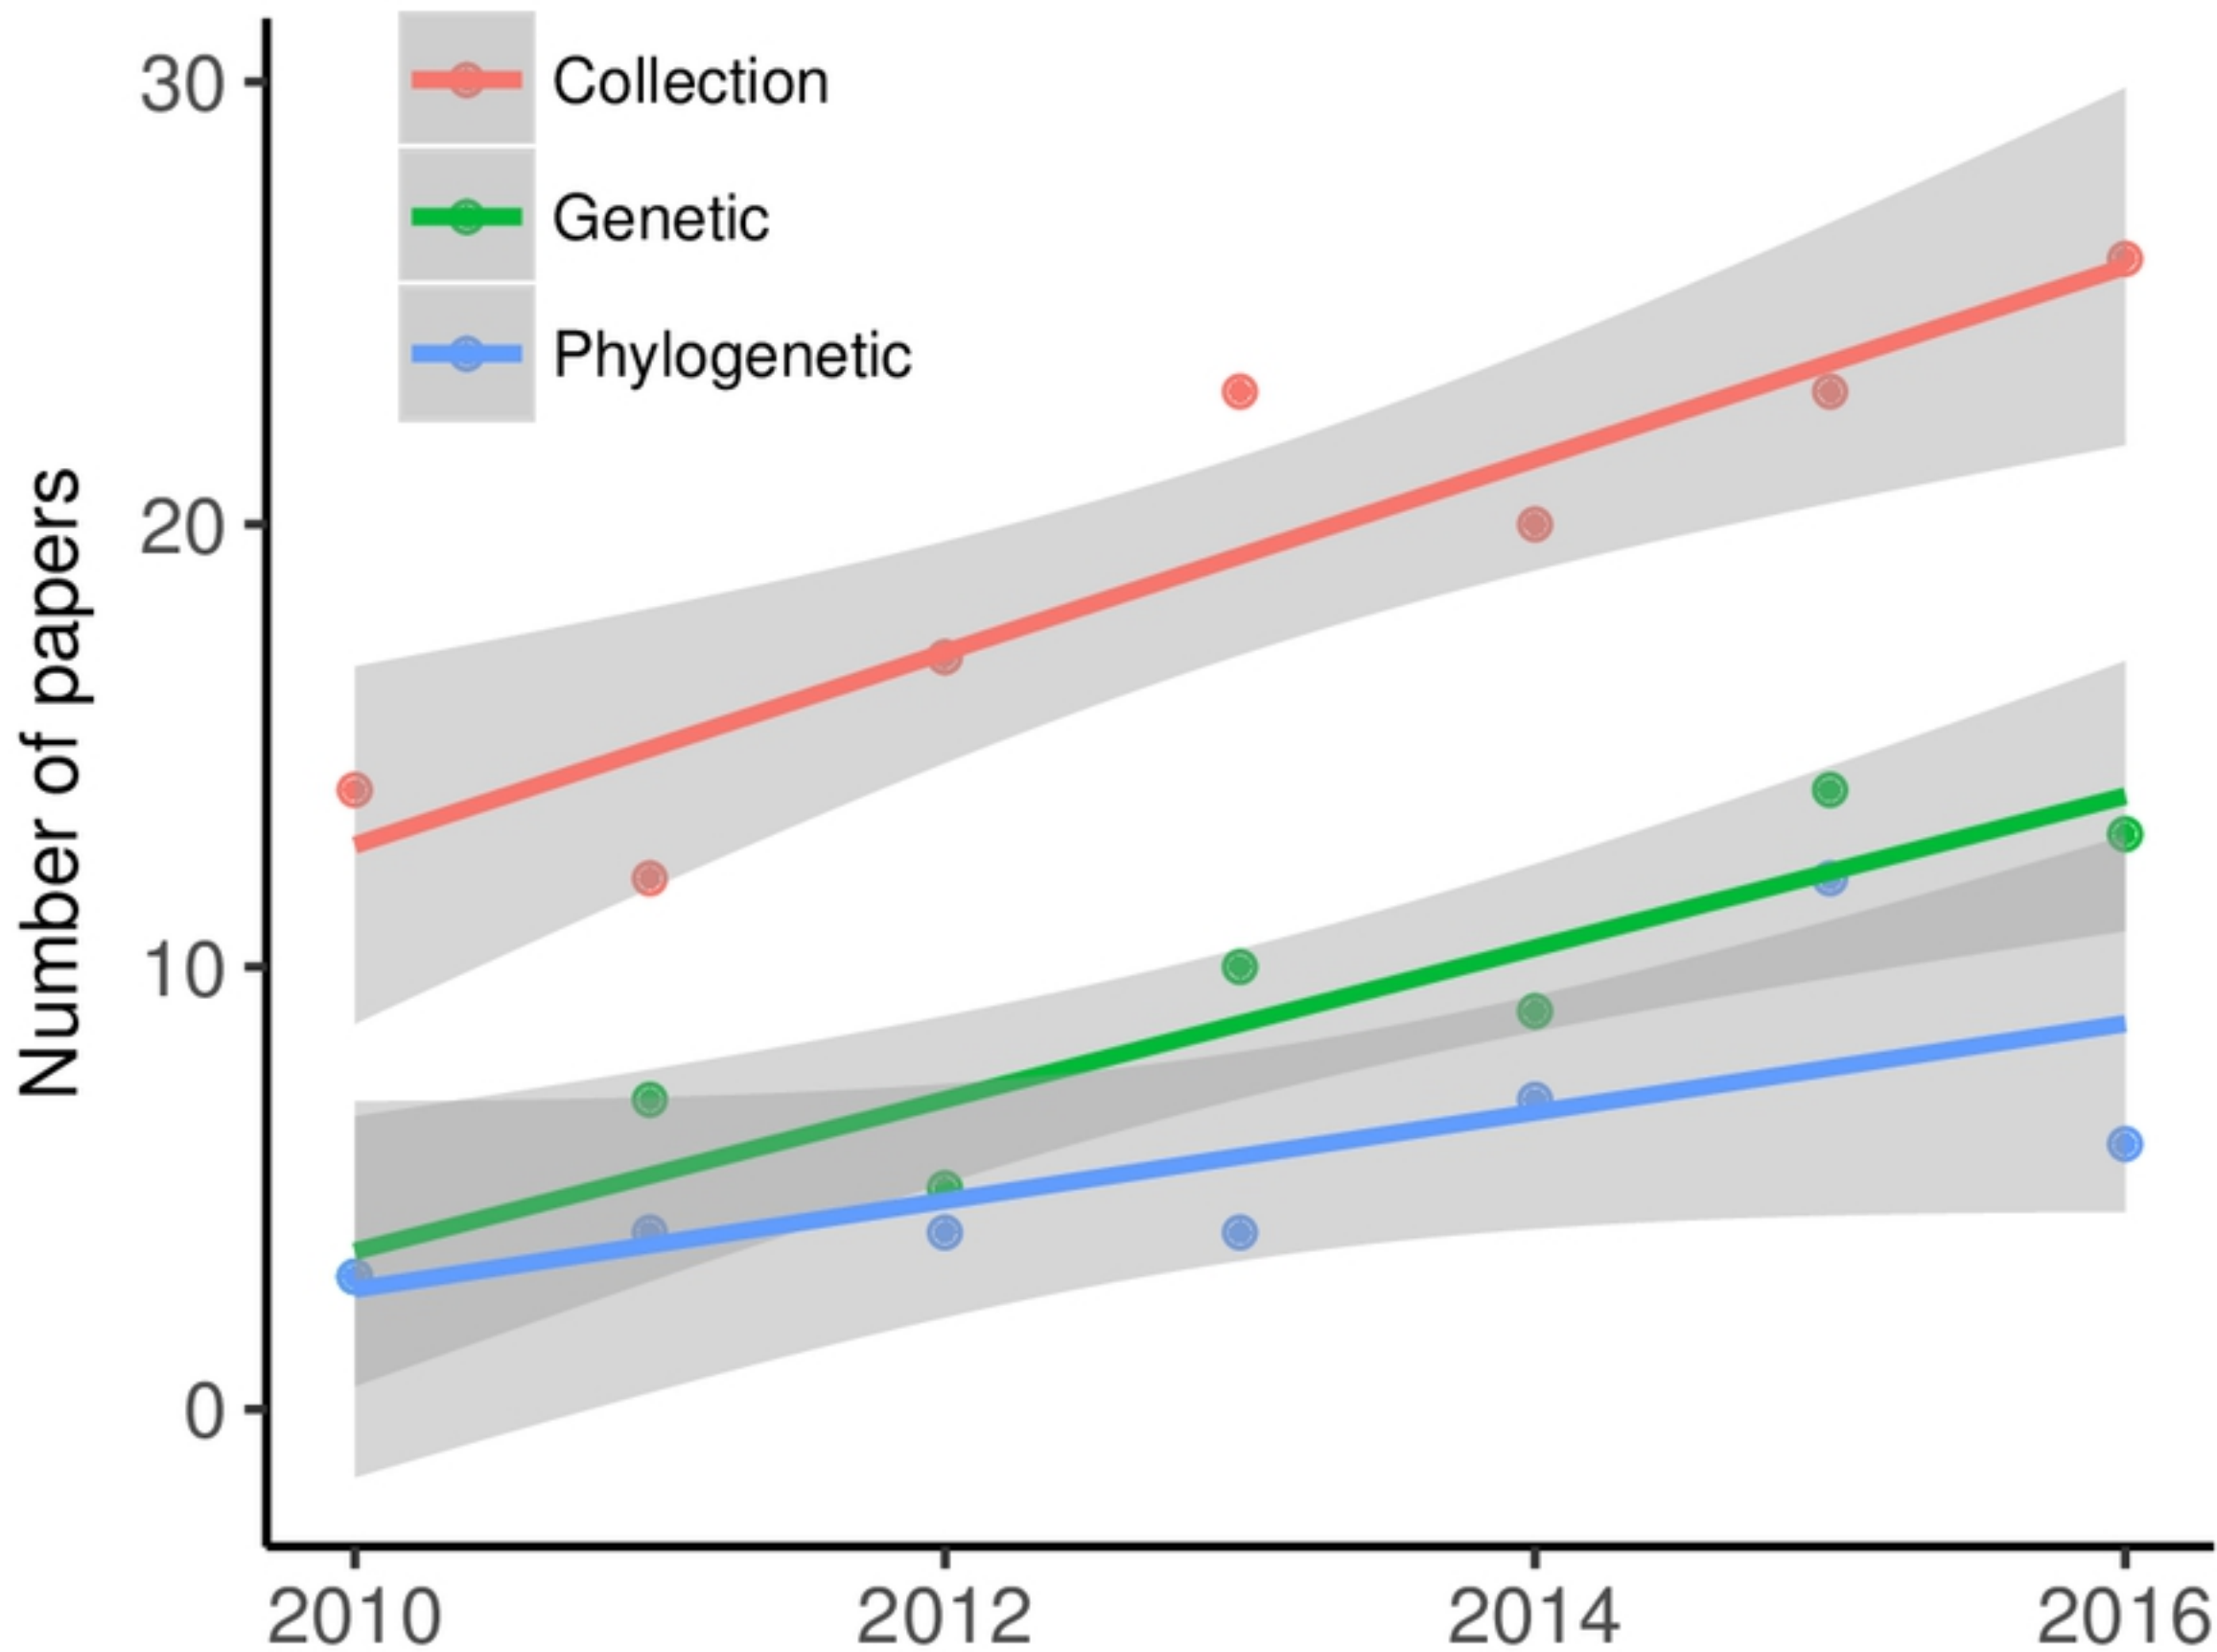

Figure 7

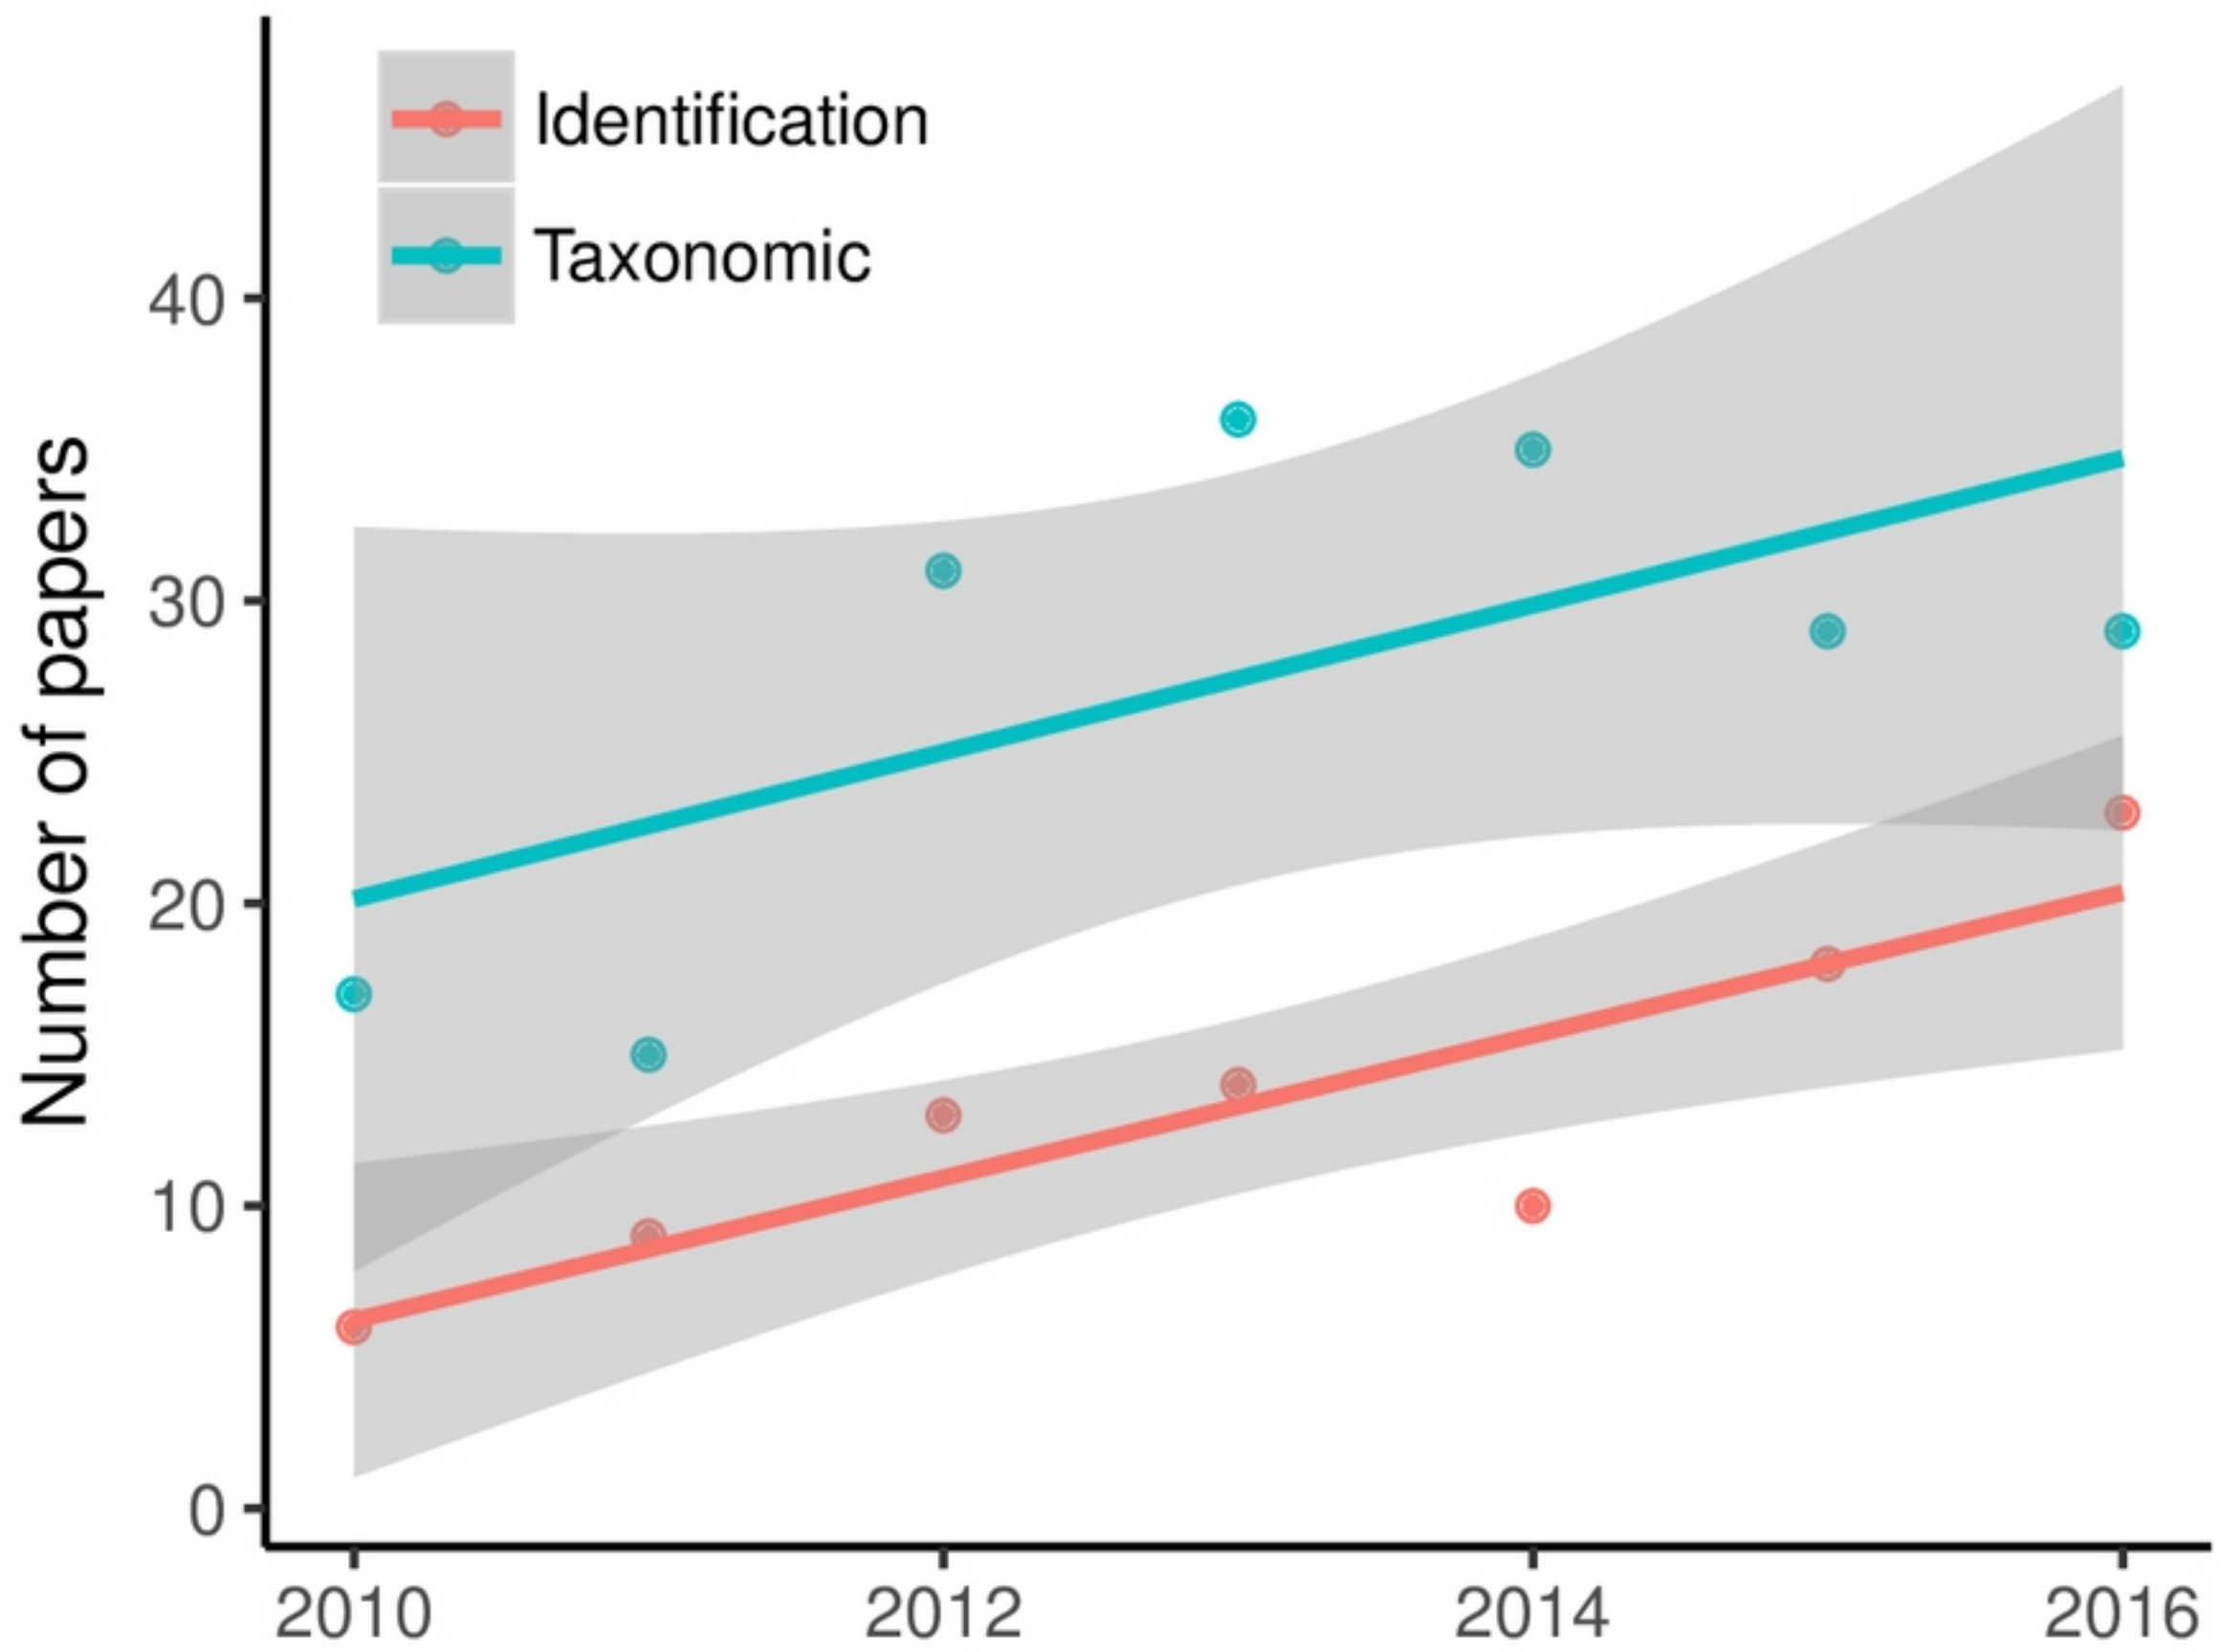

Figure 8
